# Supplementary material for: Synthesis and properties of oligodiaminogalactoses that bind to A-type oligonucleotide duplexes
Source: Royal Society of Chemistry journal article supplement (doi:10.1039/d2ob01575g), 2022-01-01
Supplement: d2ob01575g1.pdf [file d2ob01575g1.pdf]

## Supplementary information

# Synthesis and properties of oligodiaminogalactoses that bind to A-type oligonucleotide duplexes

**Tomomi Shiraishi,<sup>a</sup> Kazuki Sato,<sup>a</sup> Rintaro Iwata Hara,<sup>a, b</sup> and Takeshi Wada<sup>\*a</sup>**

<sup>a</sup> Department of Medicinal and Life Sciences, Faculty of Pharmaceutical Sciences, Tokyo University of Science, 2641 Yamazaki, Noda, Chiba 278-8510, Japan

<sup>b</sup> Department of Neurology and Neurological Science, Graduate School of Medical and Dental Sciences, Tokyo Medical and Dental University, 1-5-45, Yushima, Bunkyo-Ku, Tokyo 113-8519, Japan

\*twada@rs.tus.ac.jp

## **Table of Contents**

|                                                                     |     |
|---------------------------------------------------------------------|-----|
| 1. $^1\text{H}$ , $^{13}\text{C}$ NMR spectra .....                 | S2  |
| 2. Information of sequences of nucleic acid oligomers .....         | S16 |
| 3. Melting curves of RNA/RNA (Table 1) .....                        | S18 |
| 4. Melting curves of DNA/RNA (Table 2) .....                        | S20 |
| 5. Melting curves of DNA/DNA (Table 3) .....                        | S22 |
| 6. Melting curves of gapmer/ RNA and 2'-OMe RNA/RNA (Table 4) ..... | S23 |
| 7. UV spectra of oligomers .....                                    | S26 |
| 8. CD spectra of oligomers .....                                    | S28 |
| 9. RP-HPLC profiles of RNase A resistance experiment .....          | S30 |

# 1. <sup>1</sup>H, <sup>13</sup>C NMR spectra

<sup>1</sup>H NMR (400 MHz, CDCl<sub>3</sub>)

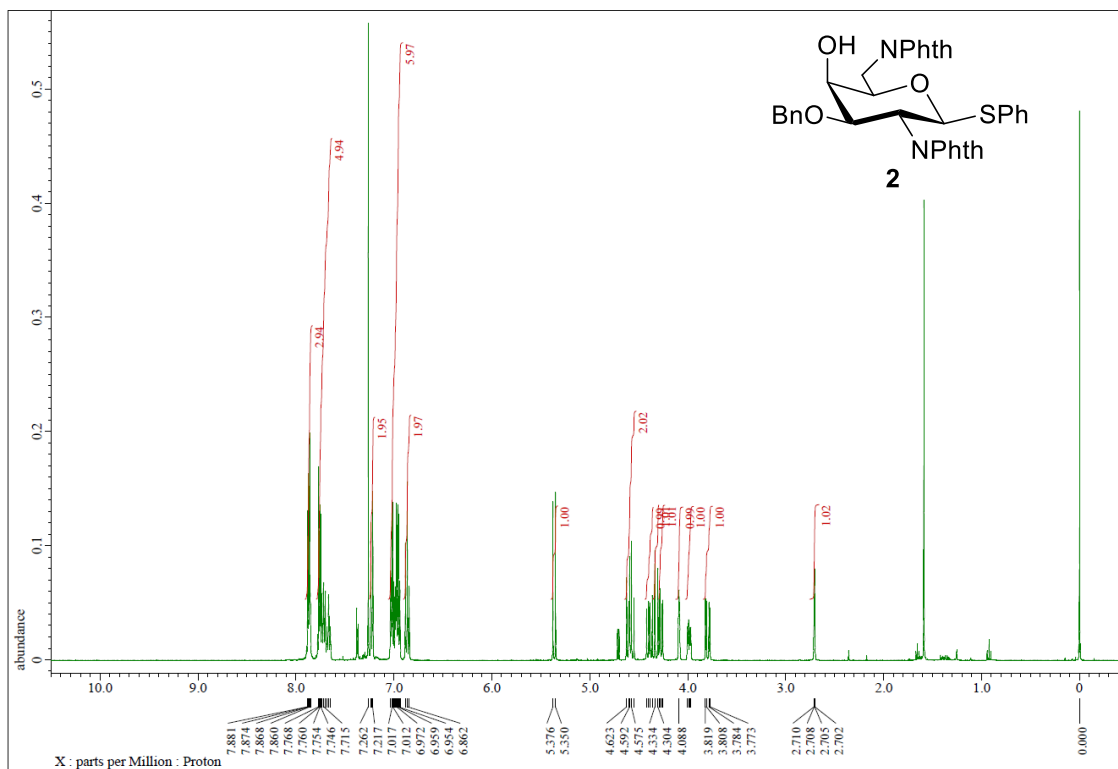

<sup>13</sup>C {<sup>1</sup>H} NMR (101 MHz, CDCl<sub>3</sub>)

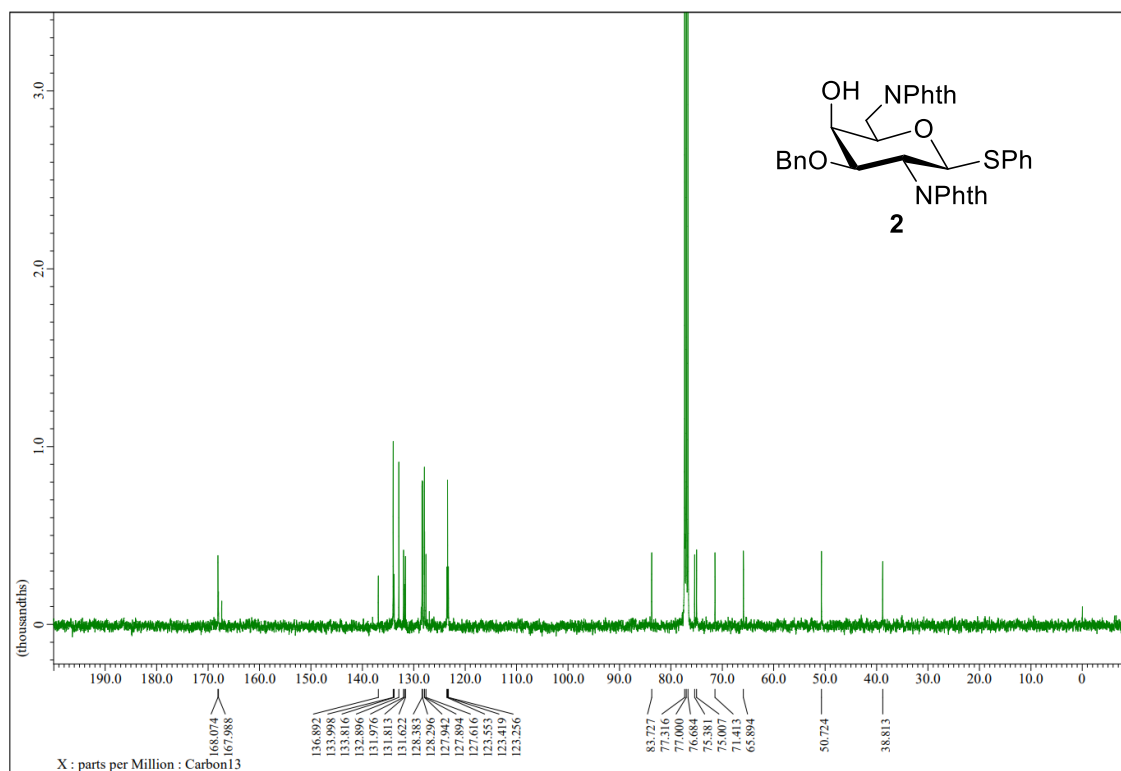

$^1\text{H}$  NMR (400 MHz,  $\text{CDCl}_3$ )

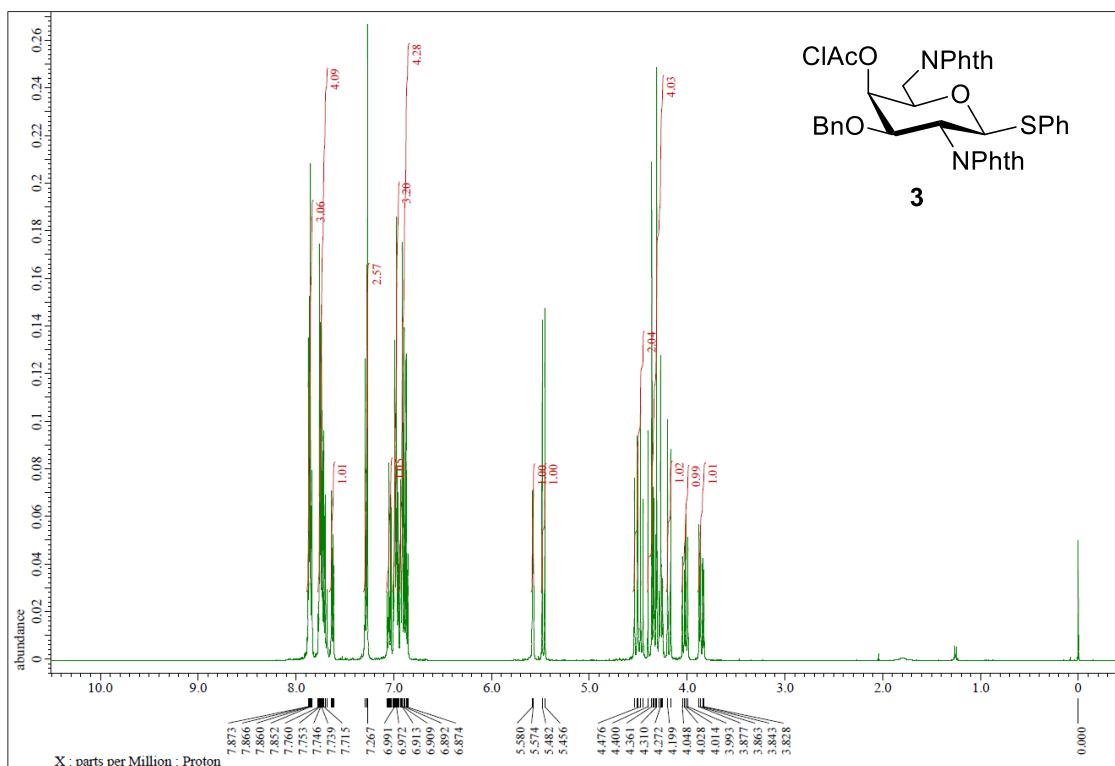

$^{13}\text{C}$   $\{^1\text{H}\}$  NMR (101 MHz,  $\text{CDCl}_3$ )

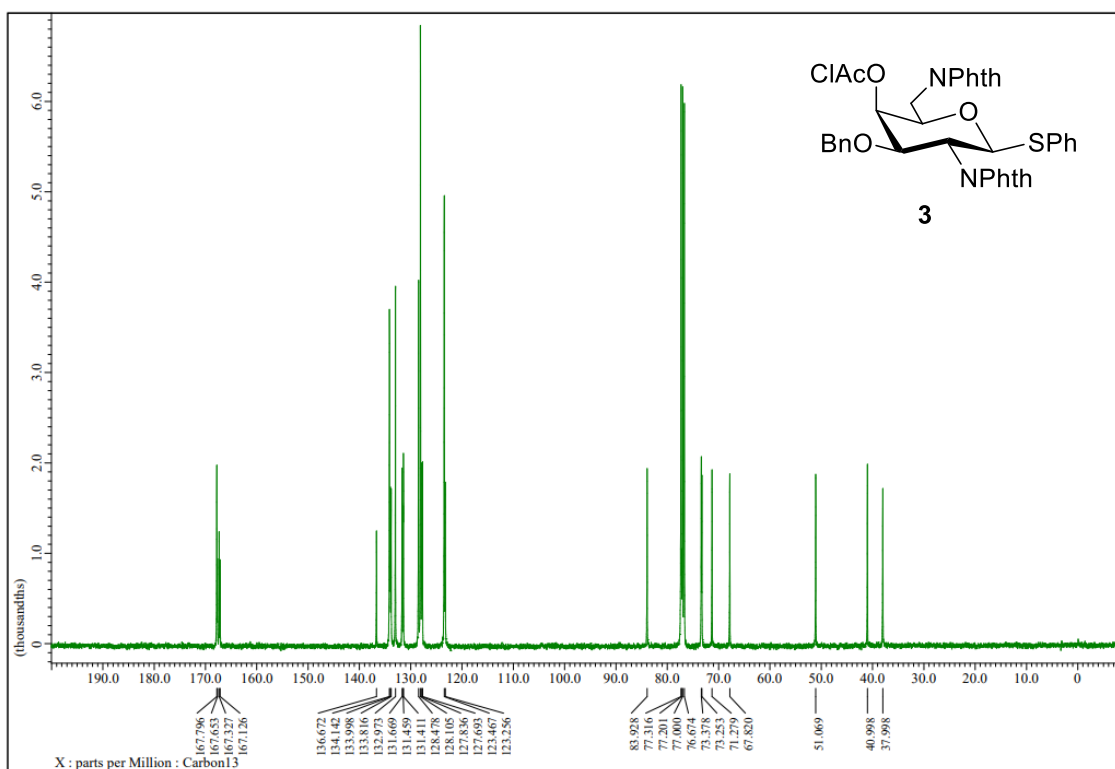

$^1\text{H}$  NMR (400 MHz,  $\text{CDCl}_3$ )

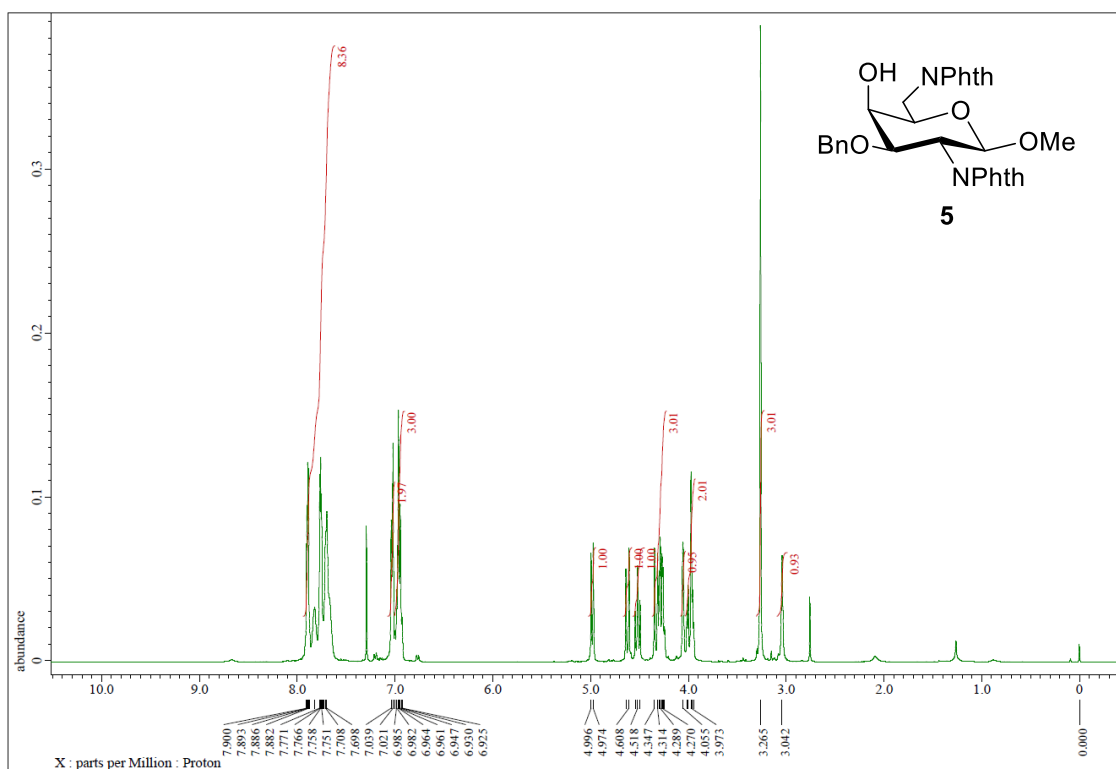

$^{13}\text{C}$   $\{^1\text{H}\}$  NMR (101 MHz,  $\text{CDCl}_3$ )

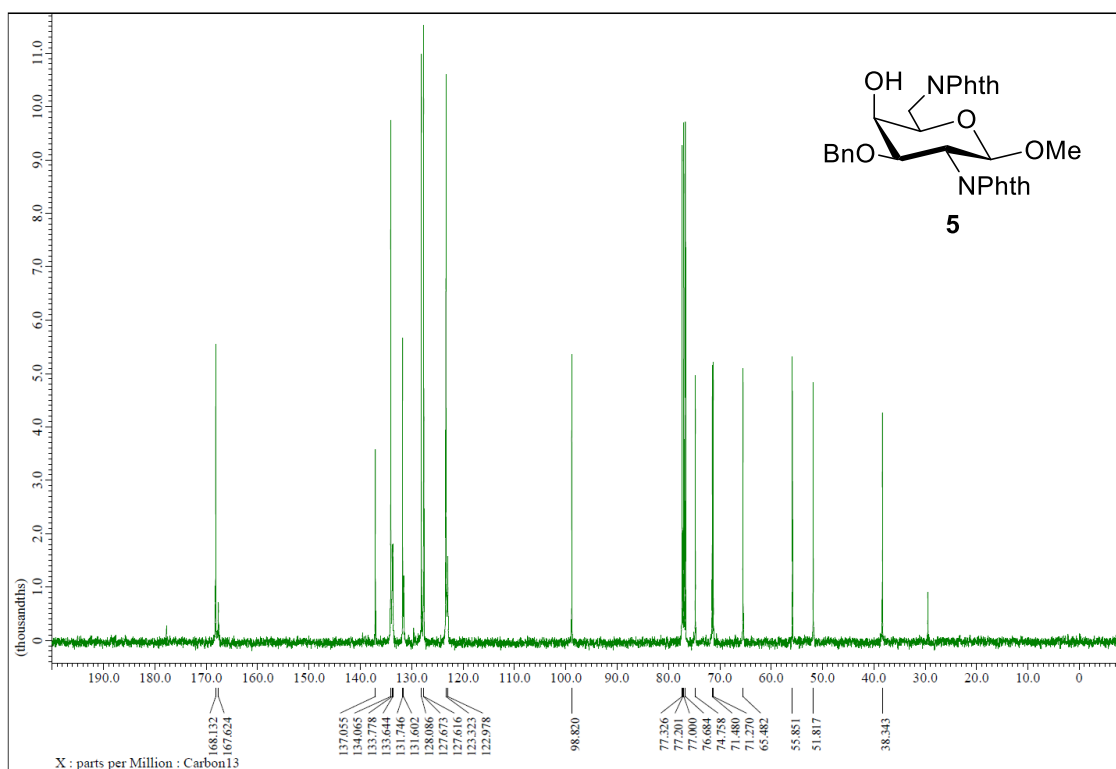

$^1\text{H}$  NMR (400 MHz,  $\text{CDCl}_3$ )

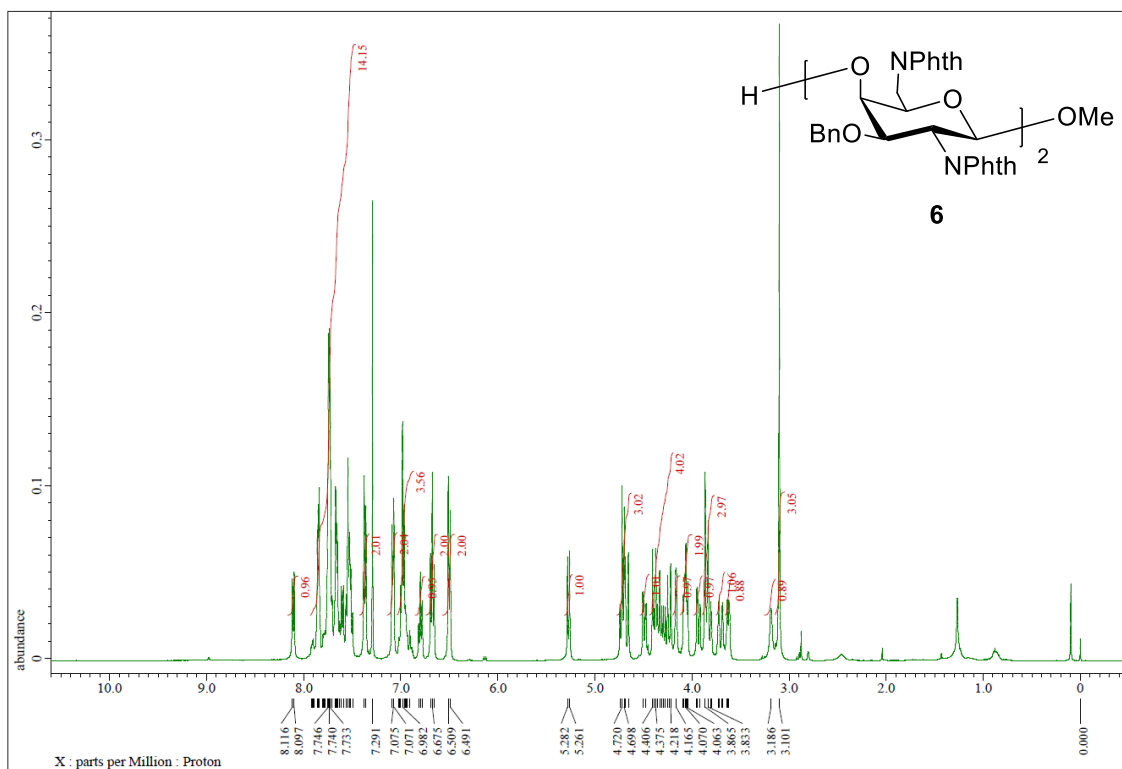

$^{13}\text{C}$   $\{^1\text{H}\}$  NMR (101 MHz,  $\text{CDCl}_3$ )

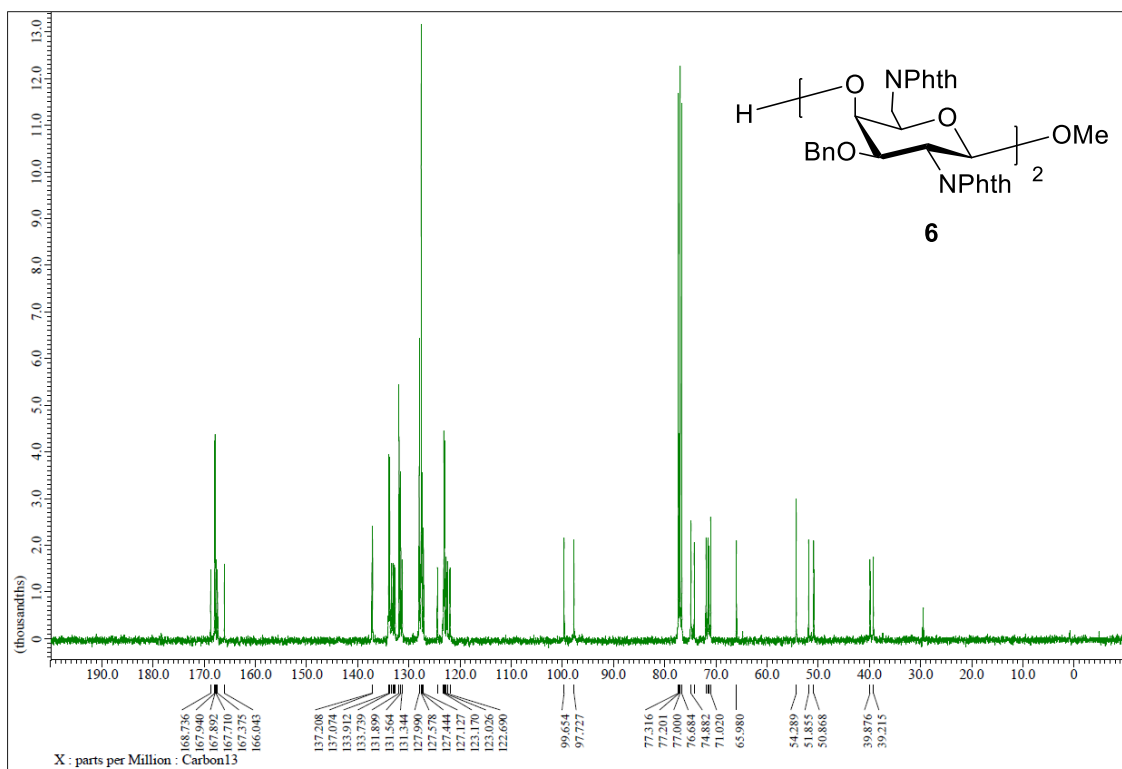

$^1\text{H}$  NMR (400 MHz,  $\text{CDCl}_3$ )

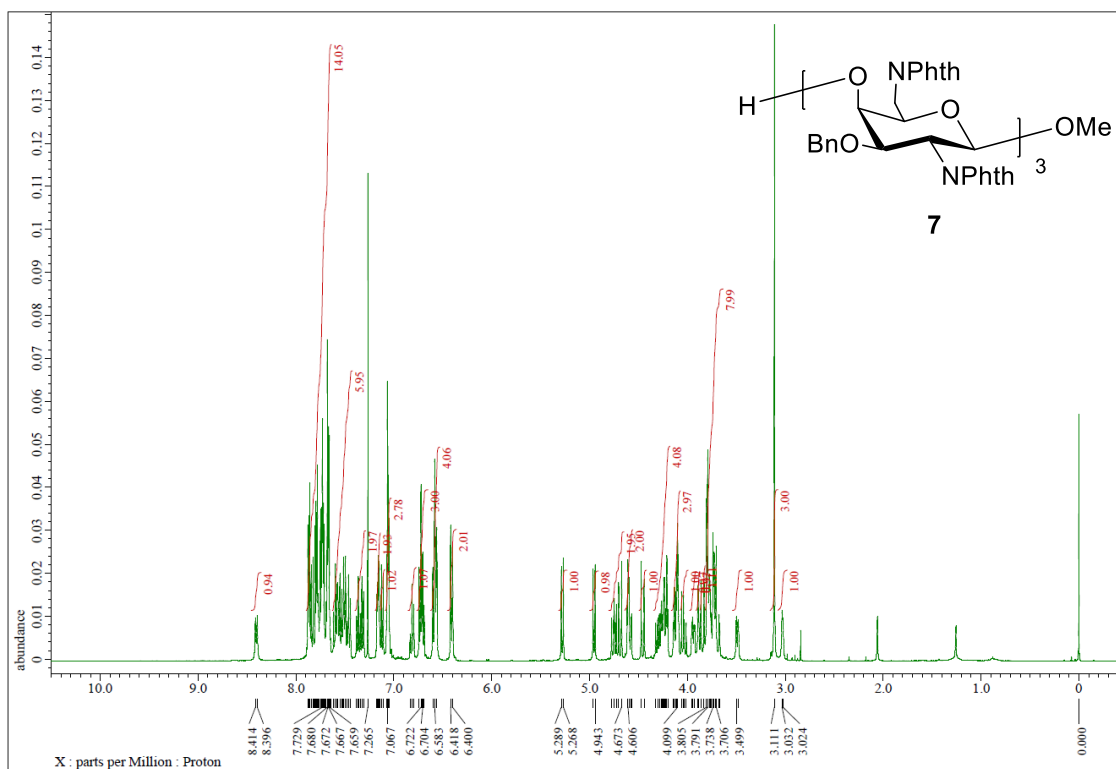

$^{13}\text{C}$   $\{^1\text{H}\}$  NMR (101 MHz,  $\text{CDCl}_3$ )

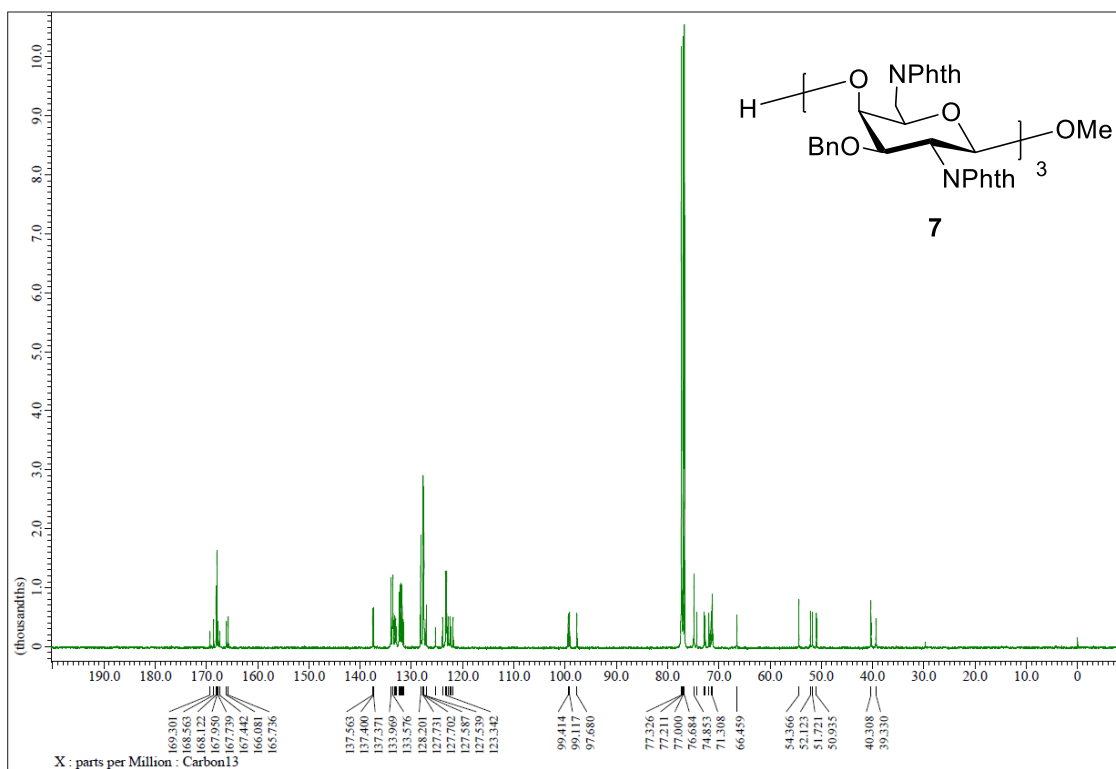

$^1\text{H}$  NMR (400 MHz,  $\text{CDCl}_3$ )

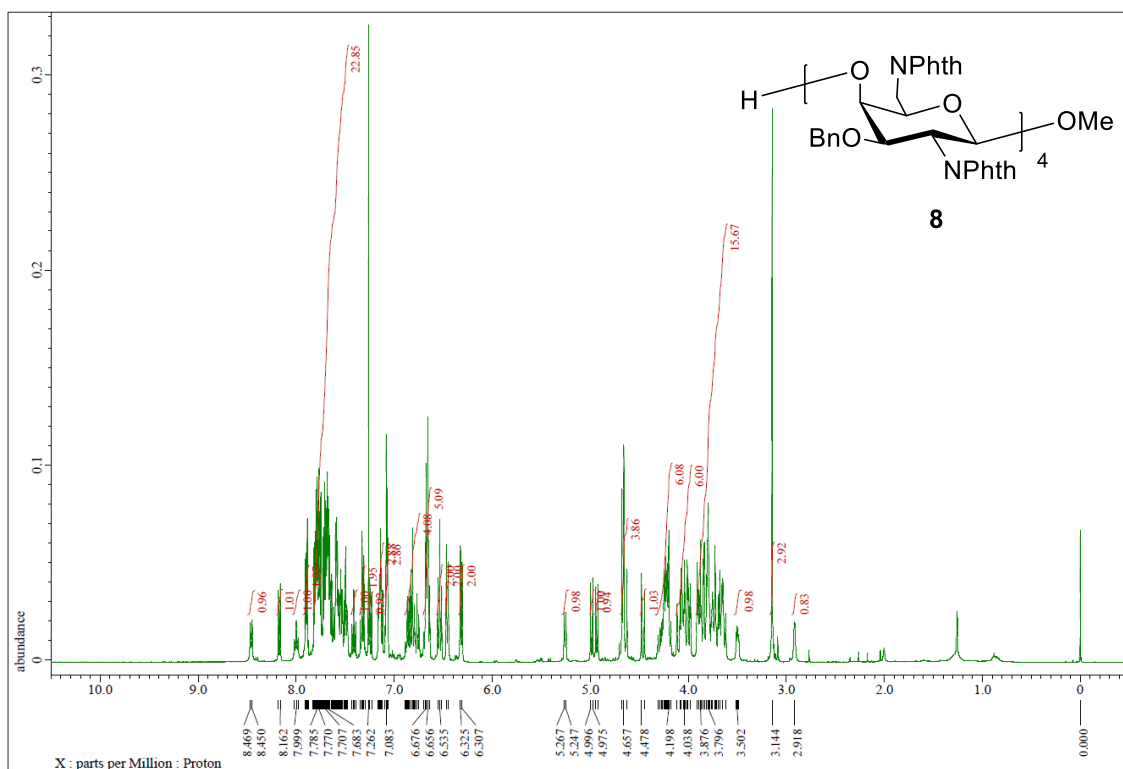

$^{13}\text{C}$   $\{^1\text{H}\}$  NMR (101 MHz,  $\text{CDCl}_3$ )

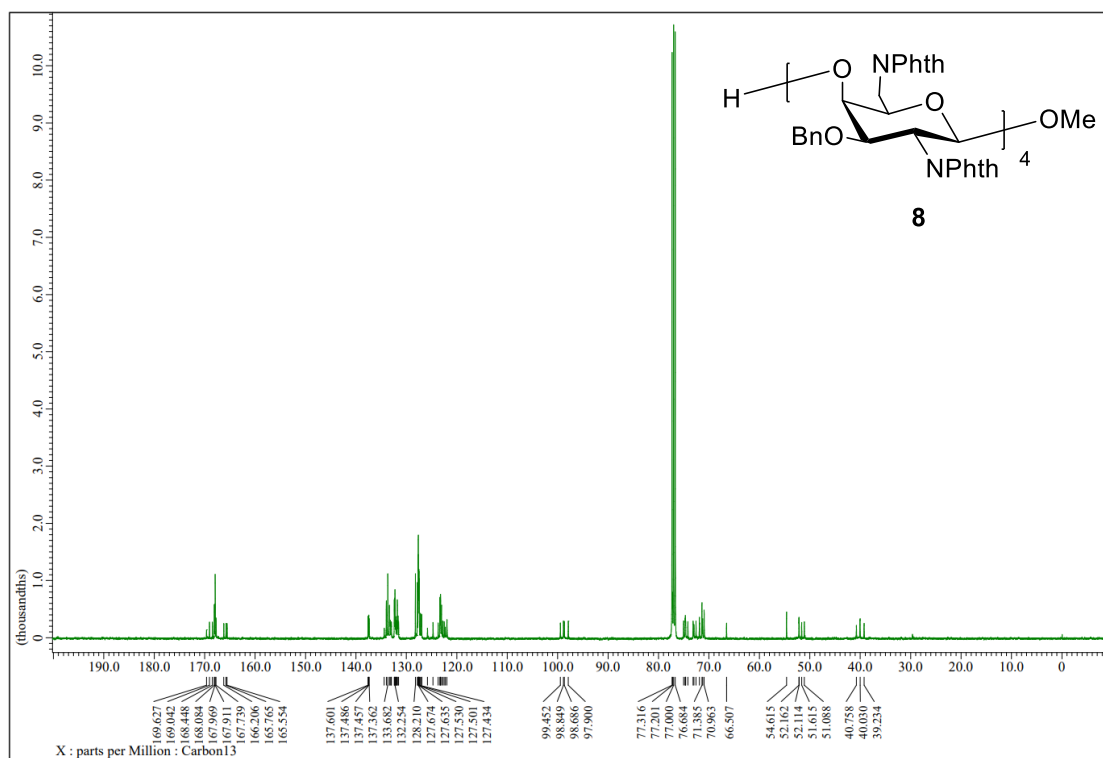



$^1\text{H}$  NMR (400 MHz,  $\text{CDCl}_3$ )

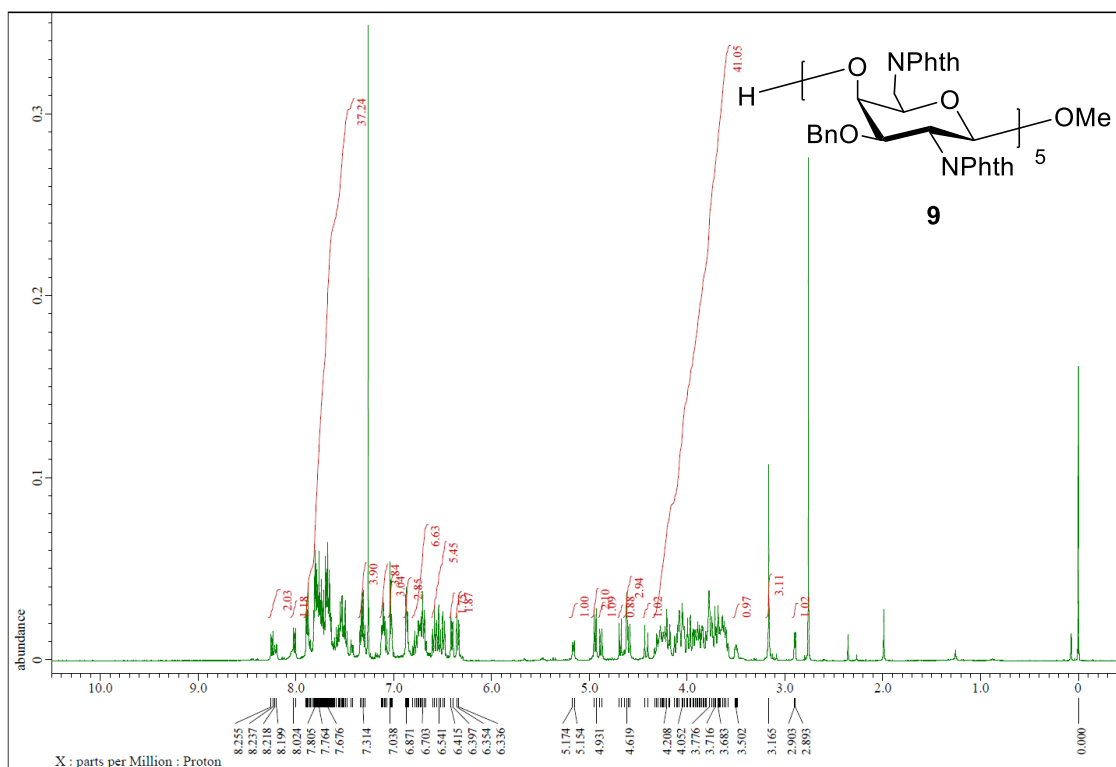

$^{13}\text{C}$   $\{^1\text{H}\}$  NMR (101 MHz,  $\text{CDCl}_3$ )

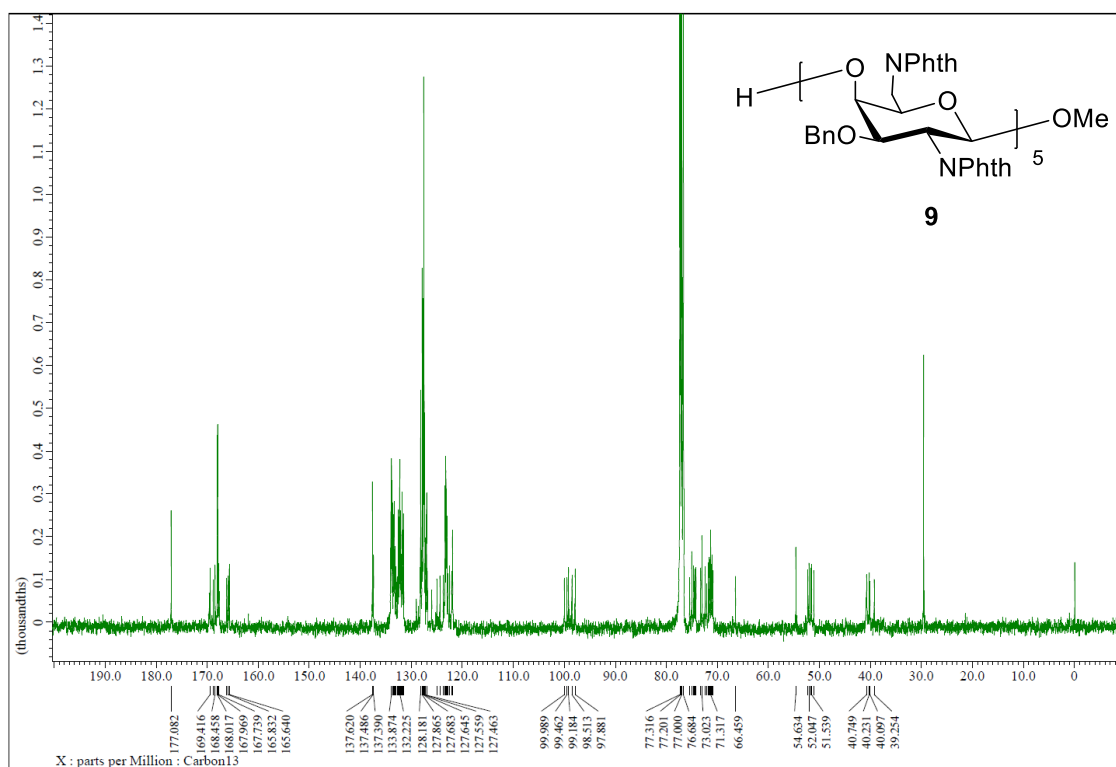

$^1\text{H}$  NMR (400 MHz,  $\text{CDCl}_3$ )

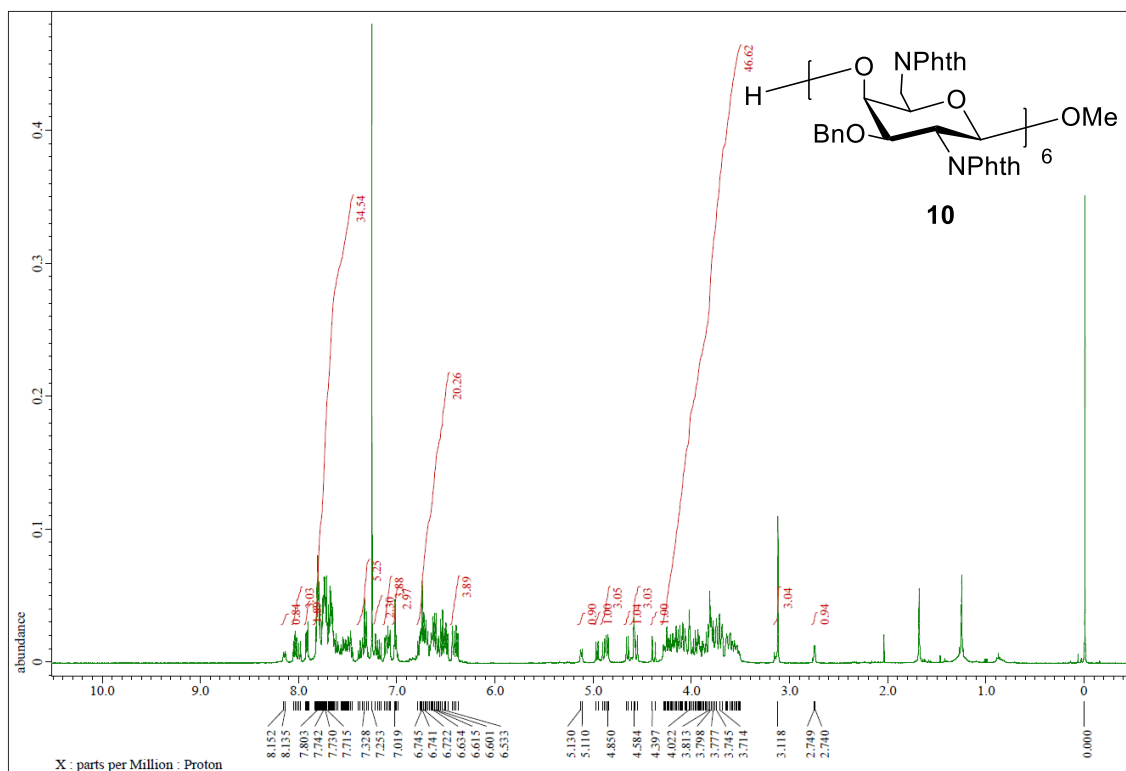

$^{13}\text{C}$   $\{^1\text{H}\}$  NMR (101 MHz,  $\text{CDCl}_3$ )

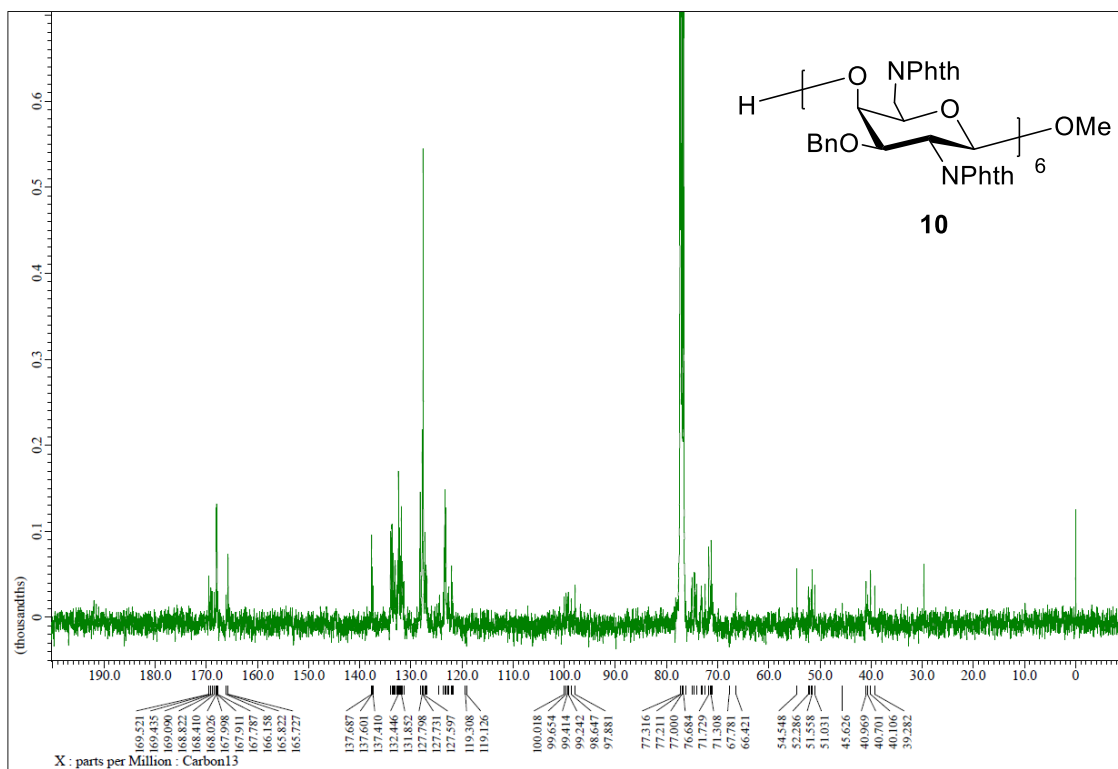

$^1\text{H}$  NMR (400 MHz,  $\text{D}_2\text{O}$ )

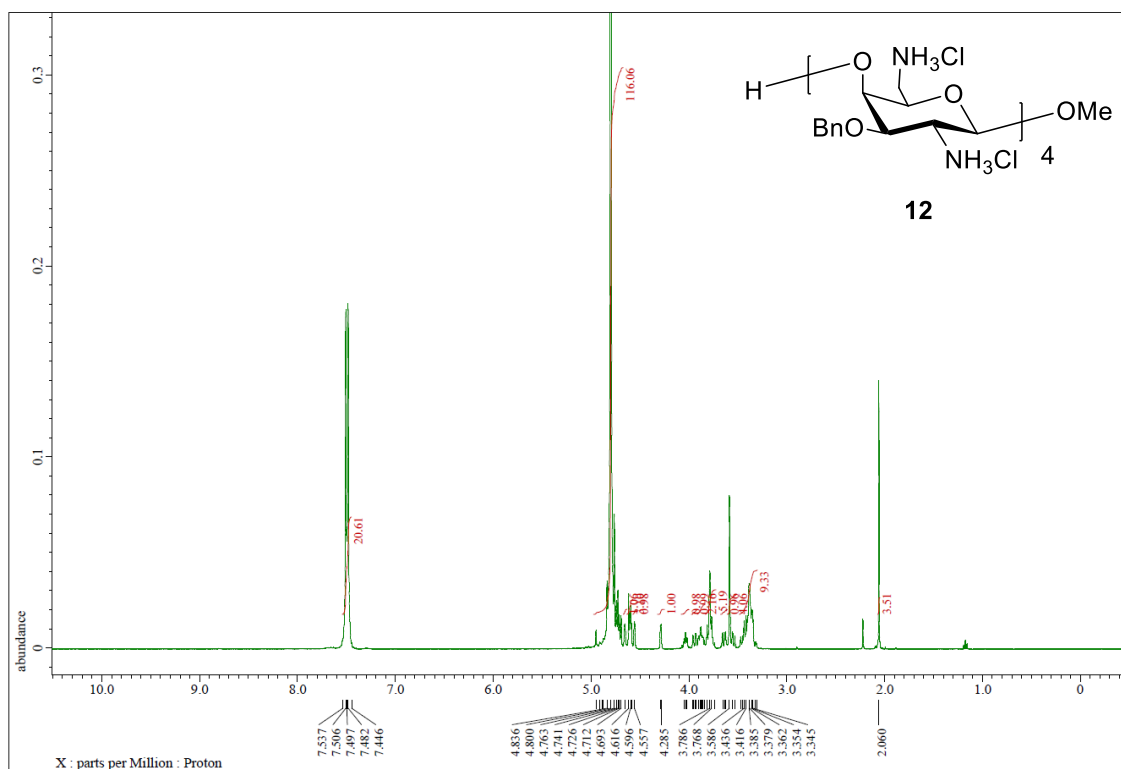

$^{13}\text{C}$   $\{^1\text{H}\}$  NMR (101 MHz,  $\text{D}_2\text{O}$ )

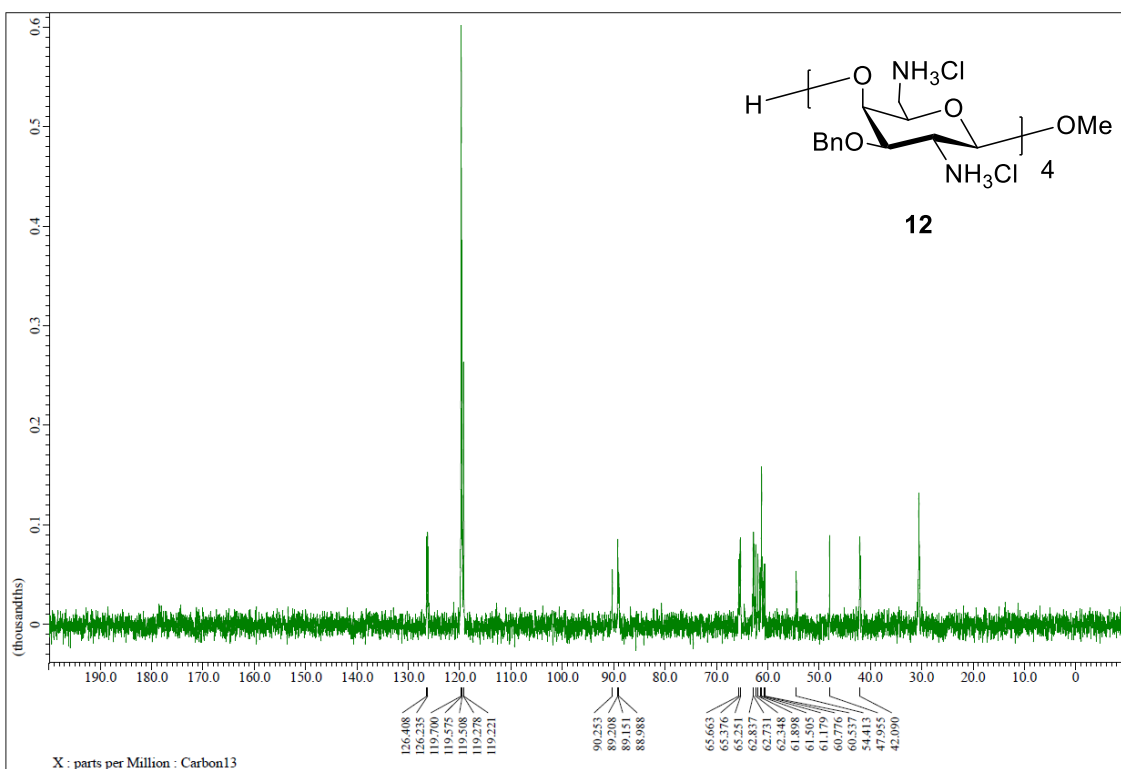

$^1\text{H}$  NMR (400 MHz,  $\text{D}_2\text{O}$ )

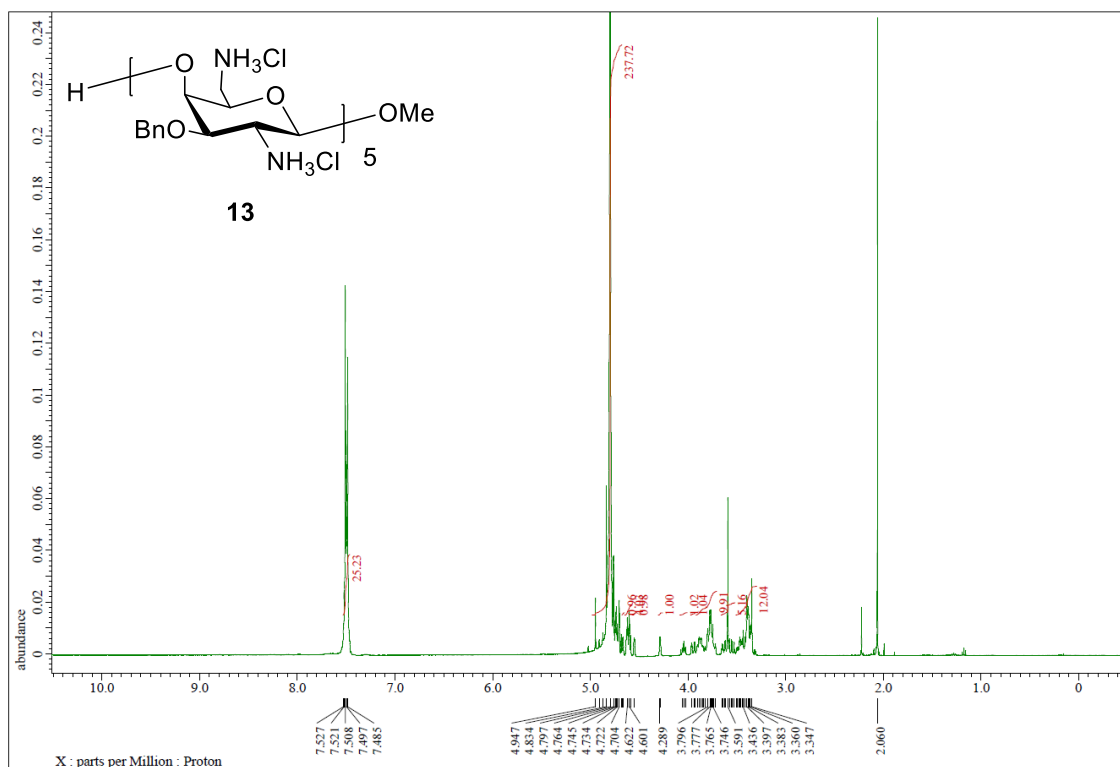

$^{13}\text{C}$  { $^1\text{H}$ } (DEPT 135) NMR (101 MHz,  $\text{D}_2\text{O}$ )

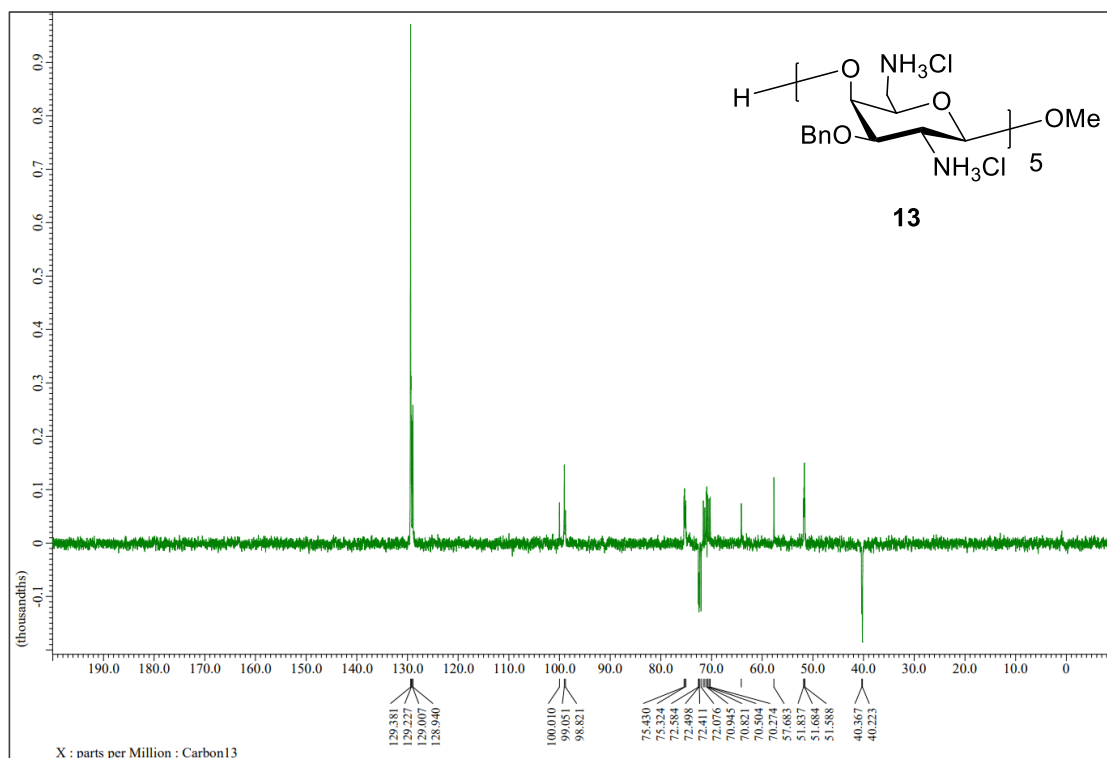

$^1\text{H}$  NMR (400 MHz,  $\text{D}_2\text{O}$ )

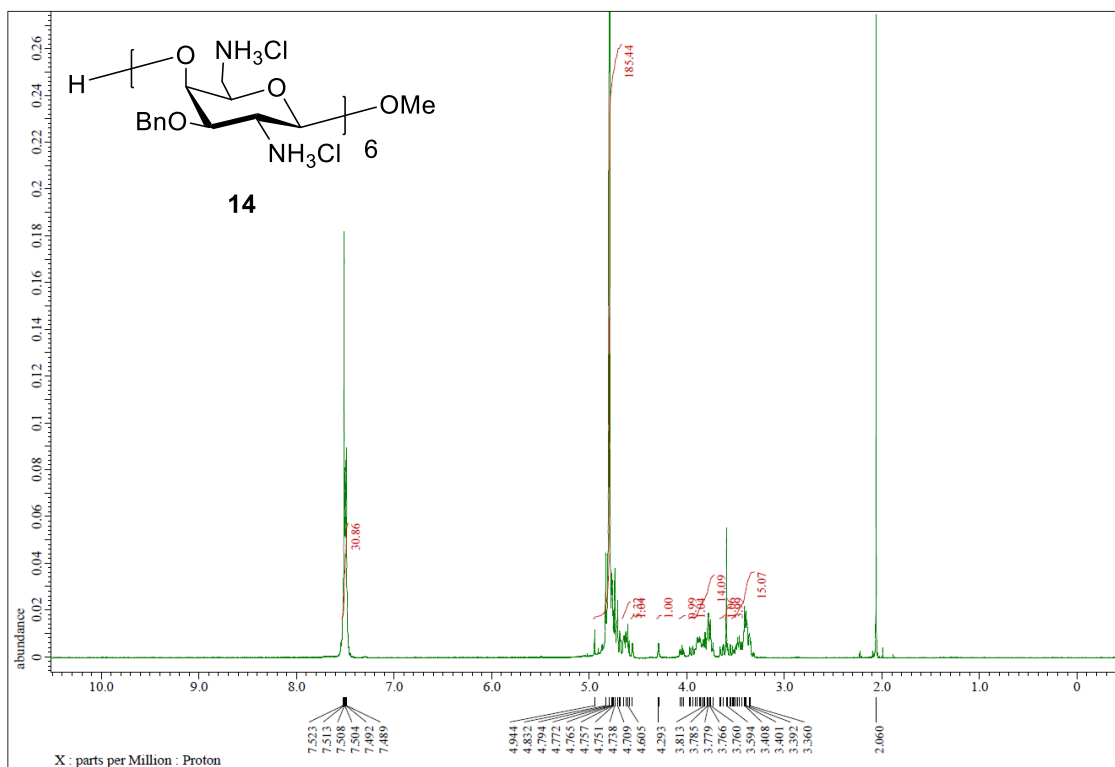

$^{13}\text{C}$   $\{^1\text{H}\}$  (DEPT 135) NMR (101 MHz,  $\text{D}_2\text{O}$ )

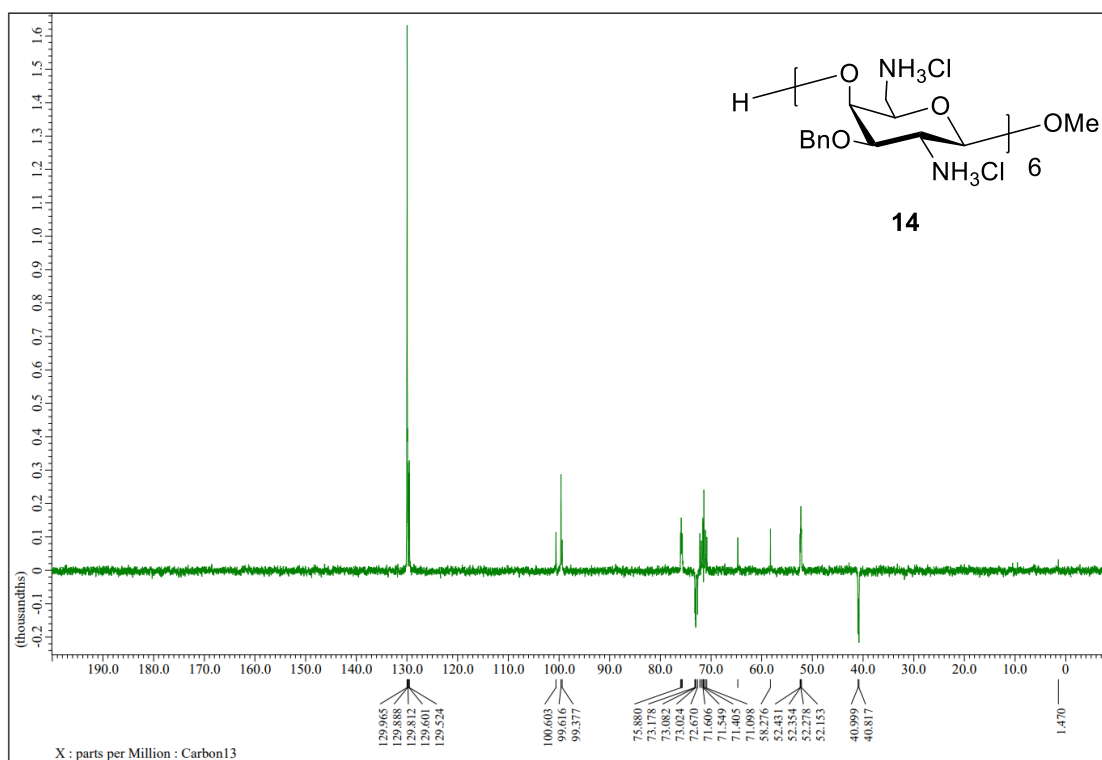

$^1\text{H}$  NMR (400 MHz,  $\text{D}_2\text{O}$ )

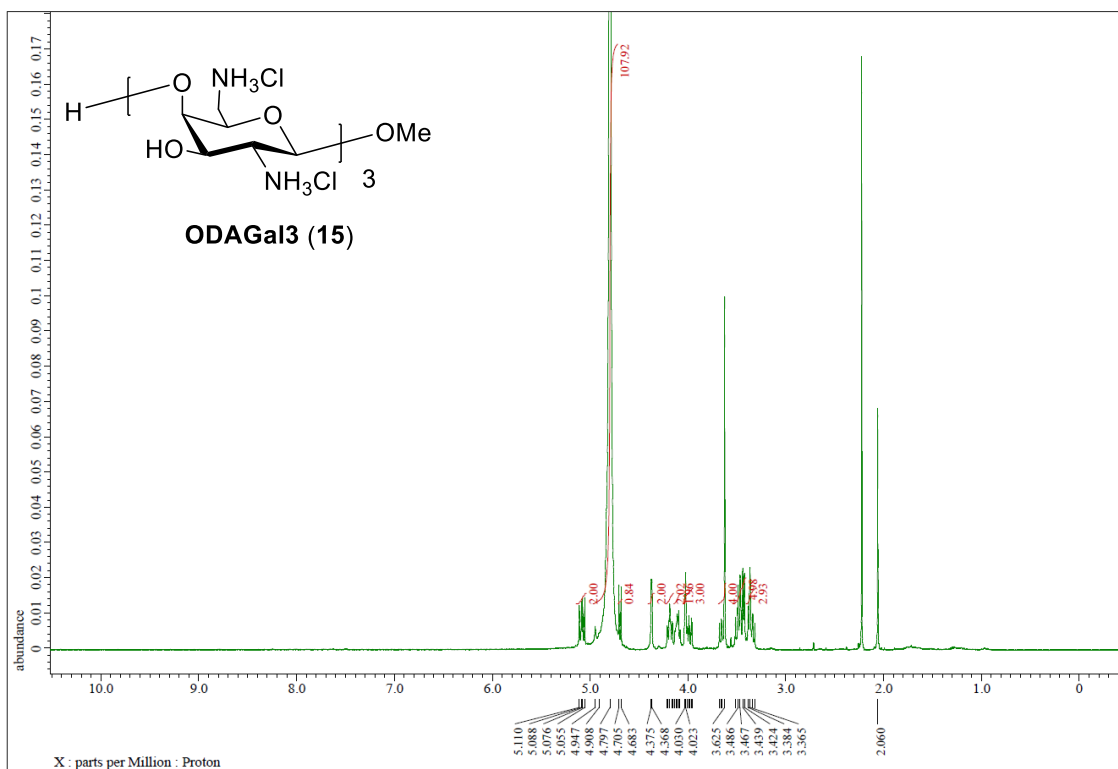

$^1\text{H}$  NMR (400 MHz,  $\text{D}_2\text{O}$ )

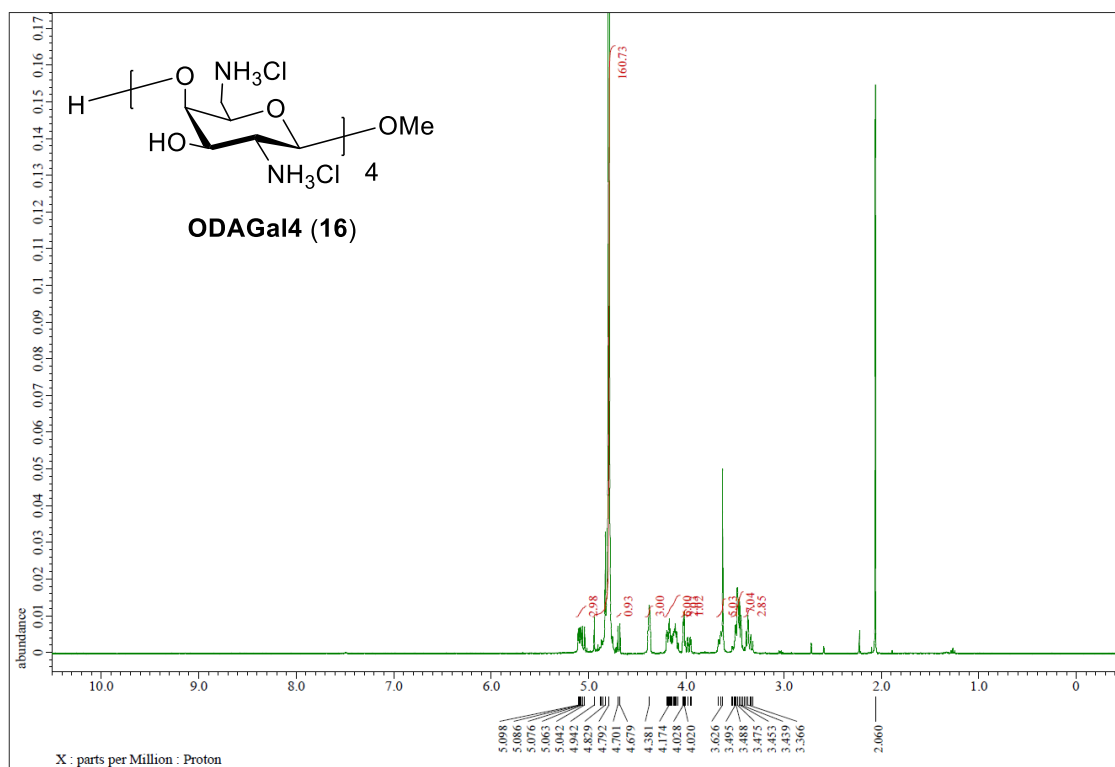

$^1\text{H}$  NMR (400 MHz,  $\text{D}_2\text{O}$ )

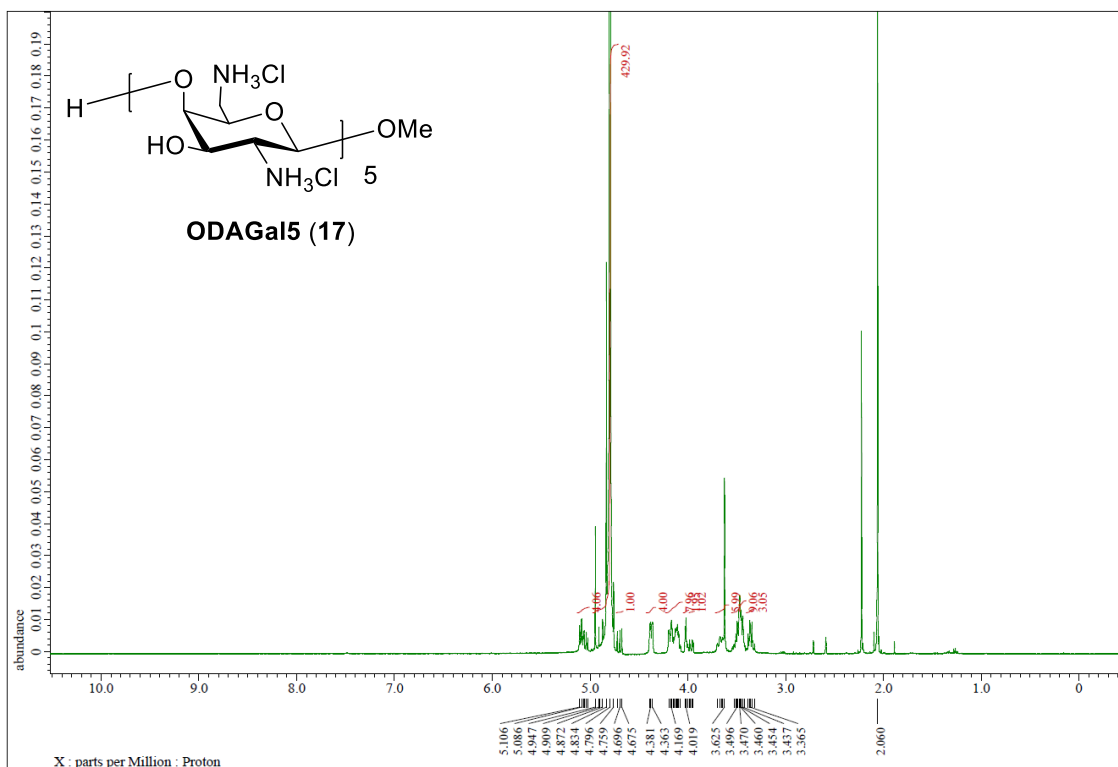

$^{13}\text{C}$   $\{^1\text{H}\}$  (DEPT 135) NMR (101 MHz,  $\text{D}_2\text{O}$ )

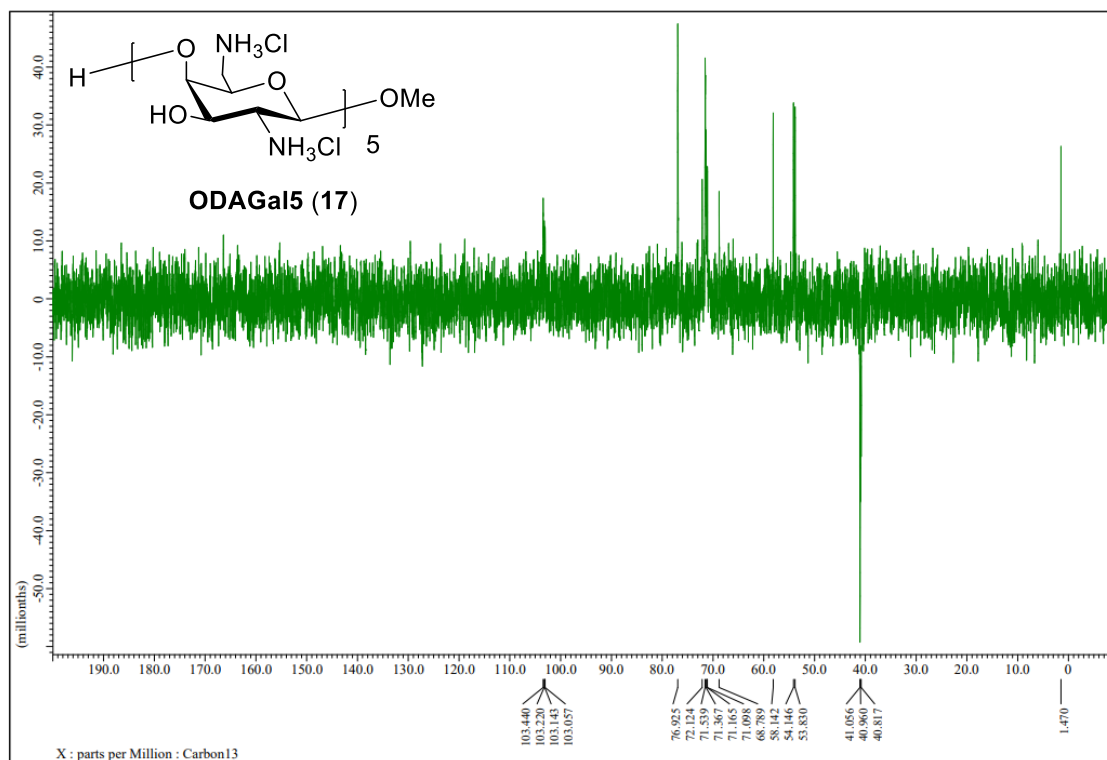

$^1\text{H}$  NMR (400 MHz,  $\text{D}_2\text{O}$ )

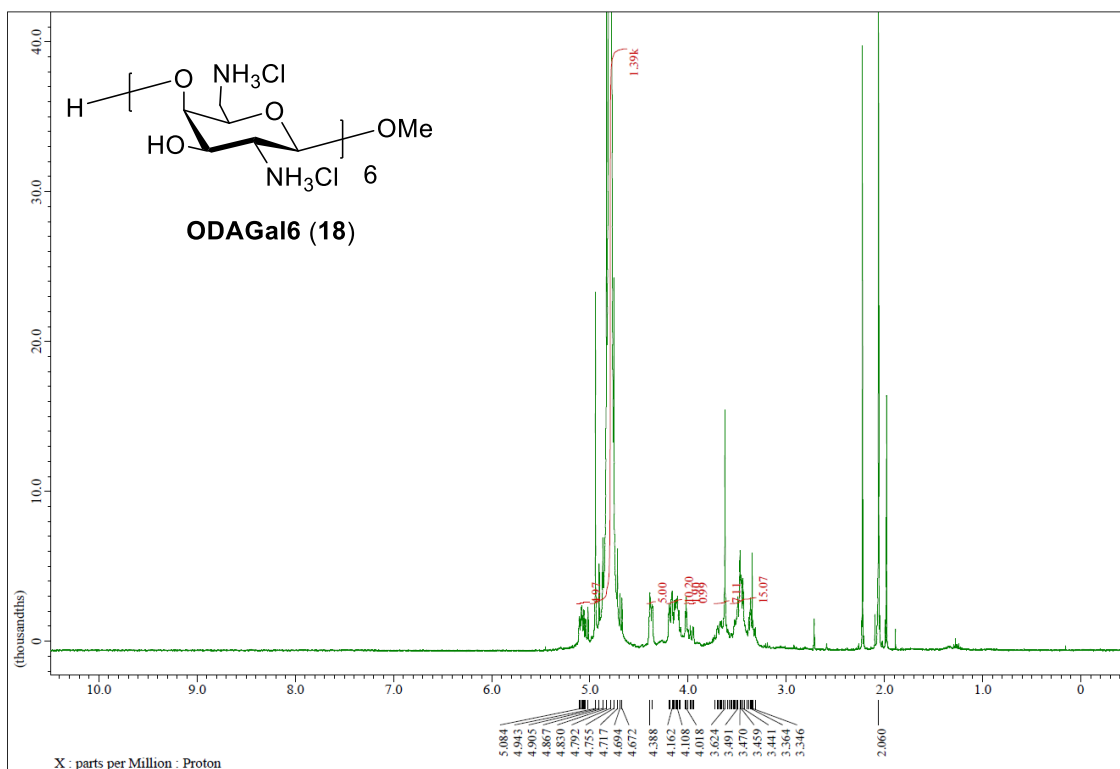

$^{13}\text{C}$   $\{^1\text{H}\}$  (DEPT 135) NMR (101 MHz,  $\text{D}_2\text{O}$ )

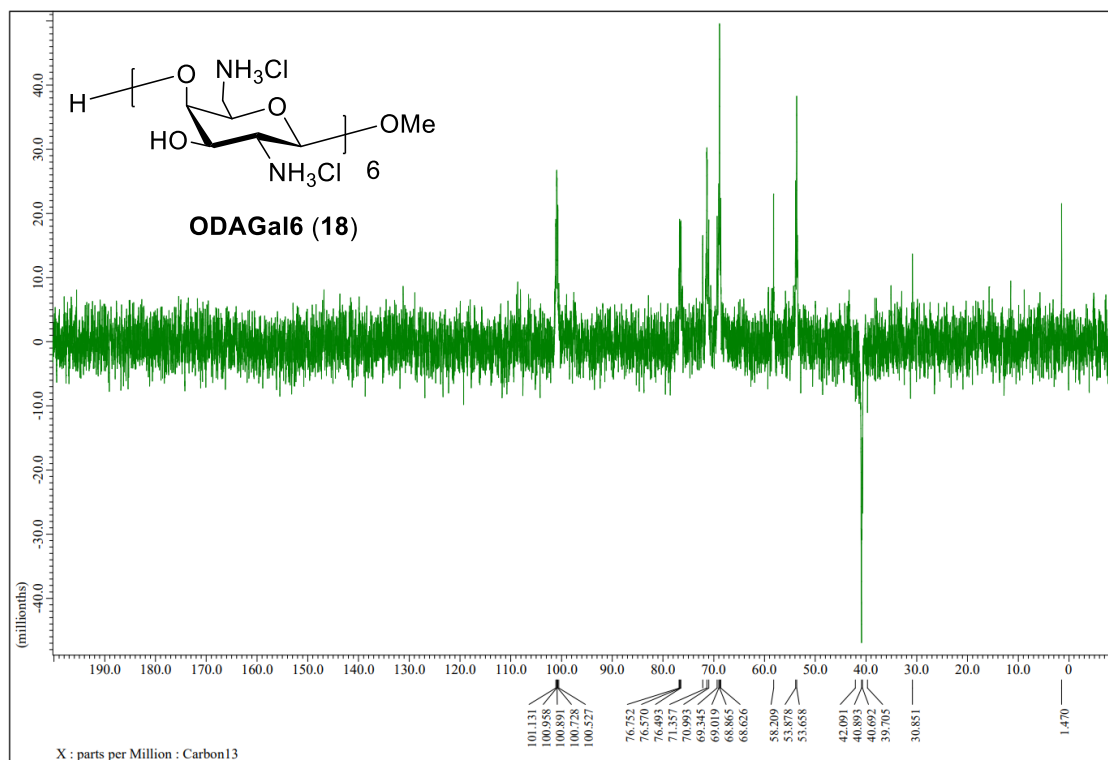



## **2. Information of sequences of nucleic acid oligomers**

### **RNA/RNA**

|        |      |                          |     |
|--------|------|--------------------------|-----|
| CAGURR | RNA  | 5'- CAGUCAGUCAGU         | -3' |
|        | cRNA | 5'- ACUGACUGACUG         | -3' |
| AP12RR | RNA  | 5'- GCAUUGGUAUUC         | -3' |
|        | cRNA | 5'- GAAUACCAAUGC         | -3' |
| AP16RR | RNA  | 5'- CAGCAUUGGUAUUCAG     | -3' |
|        | cRNA | 5'- CUGAAUACCAAUGCUG     | -3' |
| ML16RR | RNA  | 5'- CUAGUUCACUGAAUGC     | -3' |
|        | cRNA | 5'- GCAUUCAGUGAACUAG     | -3' |
| AP20RR | RNA  | 5'- GCCUCAGUCUGCUUCGCACC | -3' |
|        | cRNA | 5'- GGUGCGAAGCAGACUGAGGC | -3' |
| MP20RR | RNA  | 5'- UUCAGCAUUGGUAUUCAGUG | -3' |
|        | cRNA | 5'- CACUGAAUACCAAUGCUGAA | -3' |

Capital letter: RNA.

### **DNA/RNA**

|        |      |                          |     |
|--------|------|--------------------------|-----|
| CAGTDR | DNA  | 5'- cagtcagtcagt         | -3' |
|        | cRNA | 5'- ACUGACUGACUG         | -3' |
| AP12DR | DNA  | 5'- gcattggtattc         | -3' |
|        | cRNA | 5'- GAAUACCAAUGC         | -3' |
| AP16DR | DNA  | 5'- cagcattggtattcag     | -3' |
|        | cRNA | 5'- CUGAAUACCAAUGCUG     | -3' |
| ML16DR | DNA  | 5'- ctagttcactgaatgc     | -3' |
|        | cRNA | 5'- GCAUUCAGUGAACUAG     | -3' |
| AP20DR | DNA  | 5'- ttcagcattggtattcagtg | -3' |
|        | cRNA | 5'- CACUGAAUACCAAUGCUGAA | -3' |
| MP20DR | DNA  | 5'- gcctcagtctgcttcgacc  | -3' |
|        | cRNA | 5'- GGUGCGAAGCAGACUGAGGC | -3' |

Small letter: DNA; capital letter: RNA.

**DNA/DNA**

|        |     |                          |     |
|--------|-----|--------------------------|-----|
| AP16DD | DNA | 5'- cagcattggattcag      | -3' |
|        | DNA | 5'- ctgaataccaatgctg     | -3' |
| MP20DD | DNA | 5'- gcctcagtctgcttcgcacc | -3' |
|        | DNA | 5'- cgtgcgaagcagactgagcc | -3' |

Small letter: DNA.

**gapmer/RNA and 2'-OMe RNA/RNA**

|        |            |                                                                                                                                                                                                                                                     |     |
|--------|------------|-----------------------------------------------------------------------------------------------------------------------------------------------------------------------------------------------------------------------------------------------------|-----|
| AP12G2 | gapmer     | 5'- G <sup>M</sup> C <sup>M</sup> attggatU <sup>M</sup> C <sup>M</sup>                                                                                                                                                                              | -3' |
|        | cRNA       | 5'- GAAUACCAAUGC                                                                                                                                                                                                                                    | -3' |
| AP12G4 | gapmer     | 5'- G <sup>M</sup> C <sup>M</sup> A <sup>M</sup> U <sup>M</sup> tggtA <sup>M</sup> U <sup>M</sup> U <sup>M</sup> C <sup>M</sup>                                                                                                                     | -3' |
|        | cRNA       | 5'- GAAUACCAAUGC                                                                                                                                                                                                                                    | -3' |
| AP12MR | 2'-OMe RNA | 5'- G <sup>M</sup> C <sup>M</sup> A <sup>M</sup> U <sup>M</sup> U <sup>M</sup> G <sup>M</sup> G <sup>M</sup> U <sup>M</sup> A <sup>M</sup> U <sup>M</sup> U <sup>M</sup> C <sup>M</sup>                                                             | -3' |
|        | cRNA       | 5'- GAAUACCAAUGC                                                                                                                                                                                                                                    | -3' |
| AP16G2 | gapmer     | 5'- C <sup>M</sup> A <sup>M</sup> gcattggatucA <sup>M</sup> G <sup>M</sup>                                                                                                                                                                          | -3' |
|        | cRNA       | 5'- CUGAAUACCAAUGCUG                                                                                                                                                                                                                                | -3' |
| ML16G2 | gapmer     | 5'- C <sup>M</sup> U <sup>M</sup> agttcactgaatG <sup>M</sup> C <sup>M</sup>                                                                                                                                                                         | -3' |
|        | cRNA       | 5'- GCAUUCAGUGAACUAG                                                                                                                                                                                                                                | -3' |
| AP16G4 | gapmer     | 5'- C <sup>M</sup> A <sup>M</sup> G <sup>M</sup> C <sup>M</sup> attggatU <sup>M</sup> C <sup>M</sup> A <sup>M</sup> G <sup>M</sup>                                                                                                                  | -3' |
|        | cRNA       | 5'- CUGAAUACCAAUGCUG                                                                                                                                                                                                                                | -3' |
| ML16G4 | gapmer     | 5'- C <sup>M</sup> U <sup>M</sup> A <sup>M</sup> G <sup>M</sup> ttcactgaA <sup>M</sup> U <sup>M</sup> G <sup>M</sup> C <sup>M</sup>                                                                                                                 | -3' |
|        | cRNA       | 5'- GCAUUCAGUGAACUAG                                                                                                                                                                                                                                | -3' |
| AP16MR | 2'-OMe RNA | 5'- C <sup>M</sup> A <sup>M</sup> G <sup>M</sup> C <sup>M</sup> A <sup>M</sup> T <sup>M</sup> T <sup>M</sup> G <sup>M</sup> G <sup>M</sup> T <sup>M</sup> A <sup>M</sup> T <sup>M</sup> U <sup>M</sup> C <sup>M</sup> A <sup>M</sup> G <sup>M</sup> | -3' |
|        | cRNA       | 5'- CUGAAUACCAAUGCUG                                                                                                                                                                                                                                | -3' |
| ML16MR | 2'-OMe RNA | 5'- C <sup>M</sup> U <sup>M</sup> A <sup>M</sup> G <sup>M</sup> U <sup>M</sup> U <sup>M</sup> C <sup>M</sup> A <sup>M</sup> C <sup>M</sup> U <sup>M</sup> G <sup>M</sup> A <sup>M</sup> A <sup>M</sup> U <sup>M</sup> G <sup>M</sup> C <sup>M</sup> | -3' |
|        | cRNA       | 5'- GCAUUCAGUGAACUAG                                                                                                                                                                                                                                | -3' |

Small letter: DNA; capital letter: RNA; X<sup>M</sup>; 2'-OMe RNA.

### 3. Melting curves of RNA/RNA (Table 1)

A

CAGURR

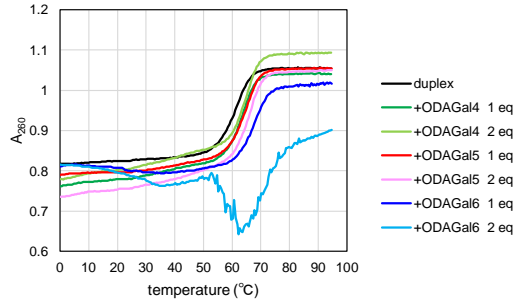

B

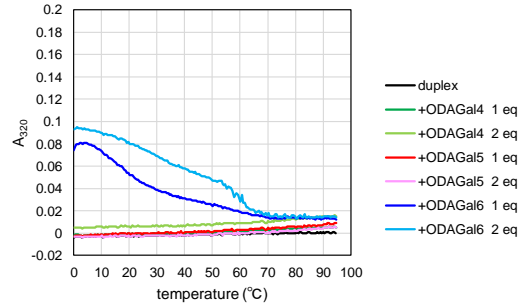

AP12RR

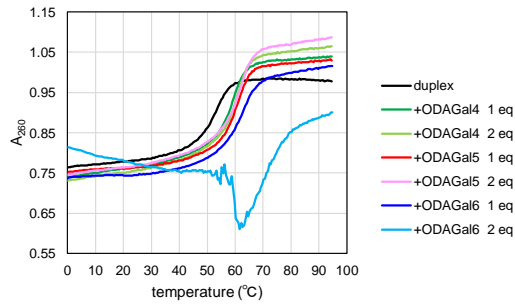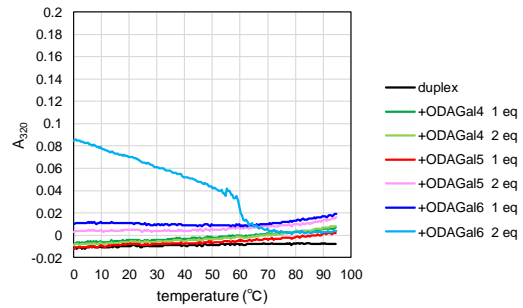

AP16RR

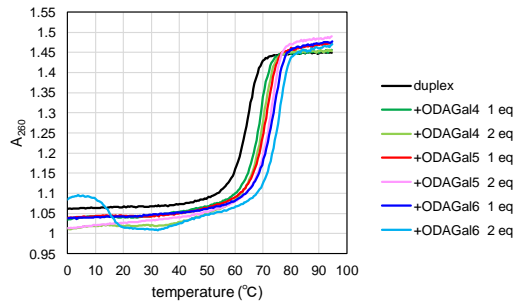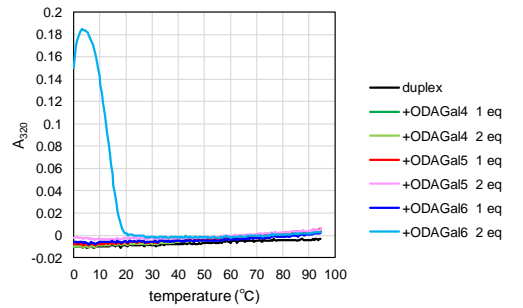

ML16RR

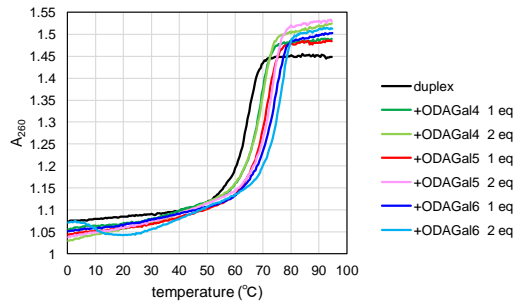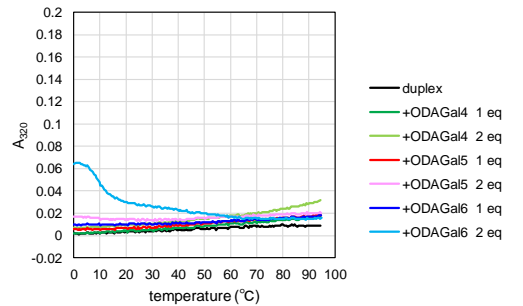

**AP20RR**

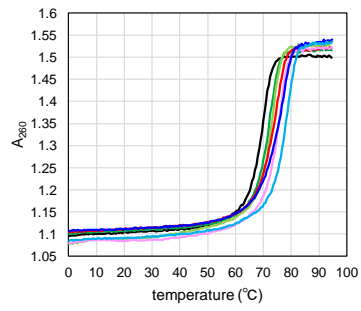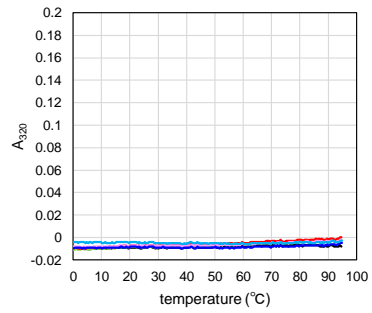

**MP20RR**

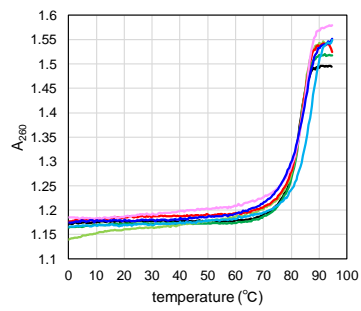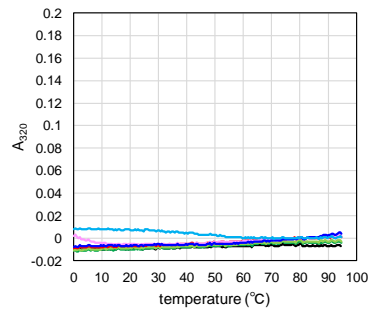

**Figure S1** UV melting curves of RNA/RNA in the absence and presence of ODAGals. (A) at 260 nm (B) at 320 nm.

## 4. Melting curves of DNA/RNA (Table 2)

A

CAGTDR

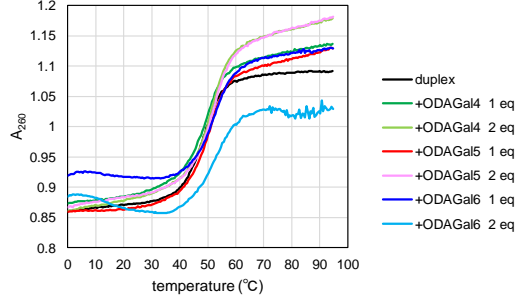

B

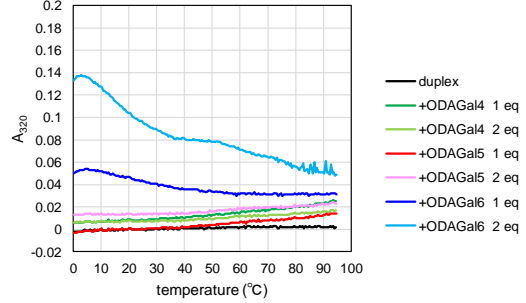

AP12DR

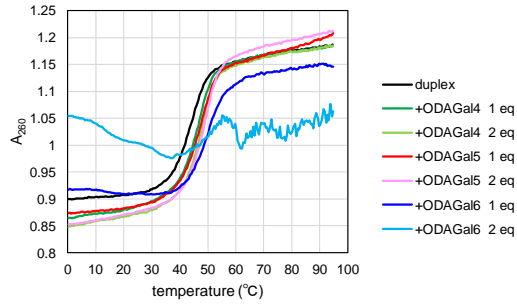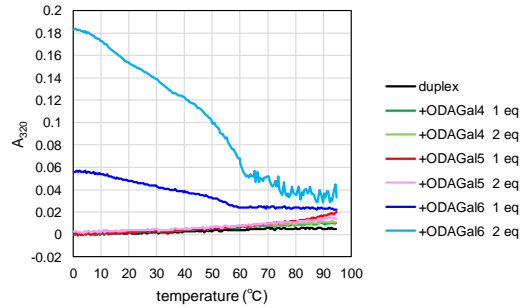

AP16DR

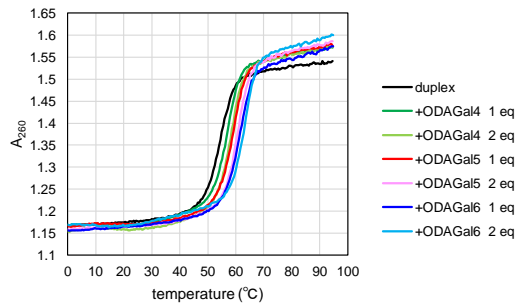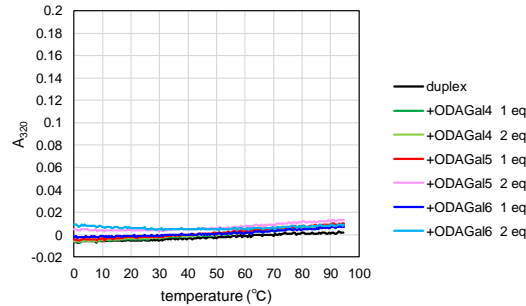

ML16DR

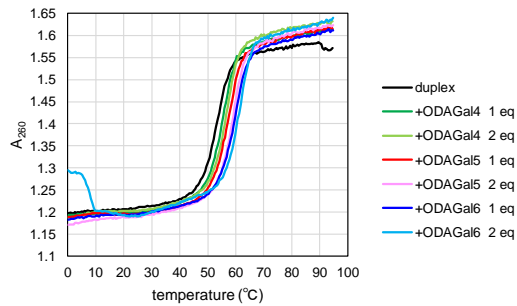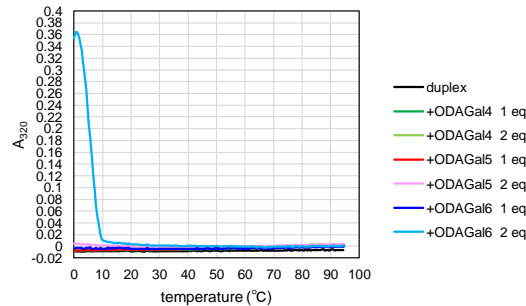

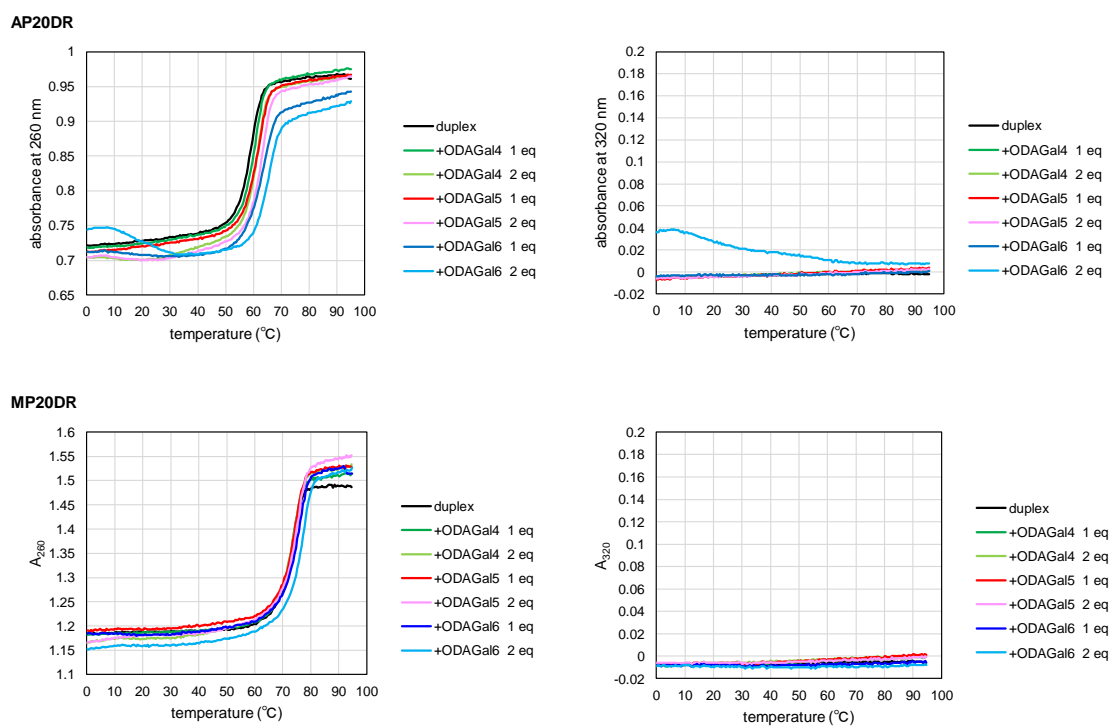

**Figure S2** UV melting curves of DNA/RNA in the absence and presence of ODAGals. (A) at 260 nm (B) at 320 nm.

## 5. Melting curves of DNA/DNA (Table 3)

A

AP16DD

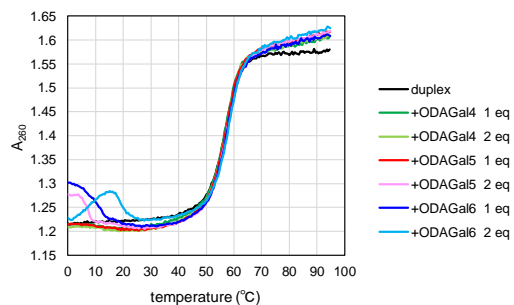

B

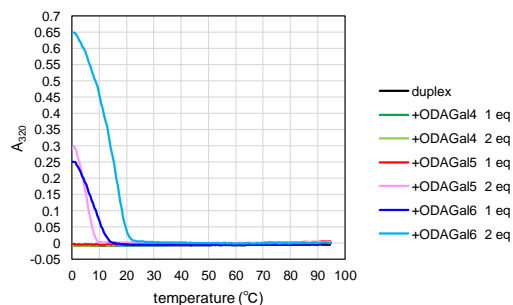

MP20DD

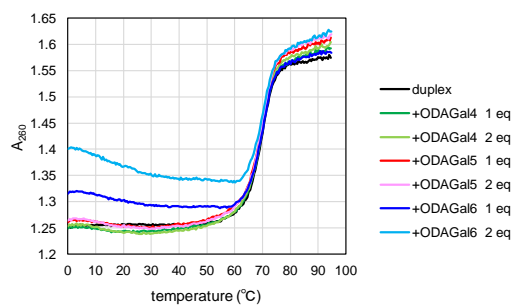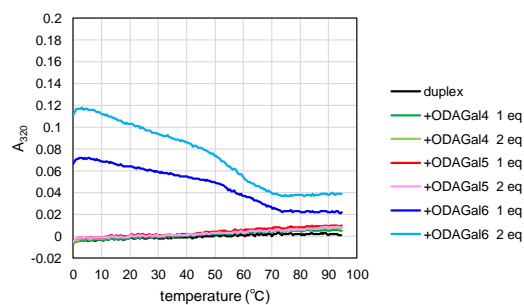

**Figure S3** UV melting curves of DNA/DNA in the absence and presence of ODAGals. (A) at 260 nm (B) at 320 nm.

## 6. Melting curves of gapmer/ RNA and 2'-OMe RNA/RNA (Table 4)

A

AP12G2

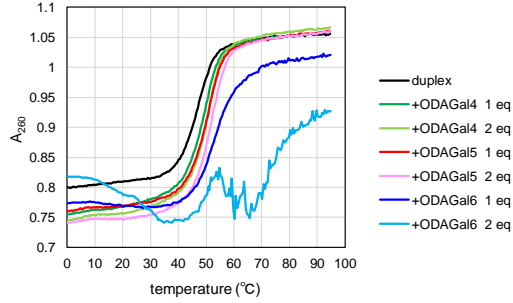

B

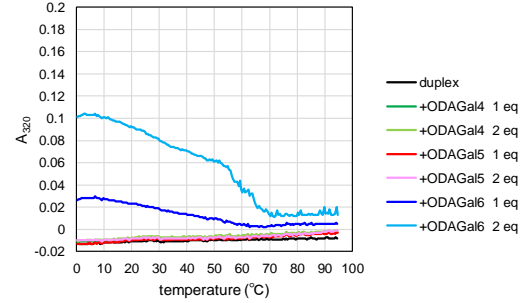

AP12G4

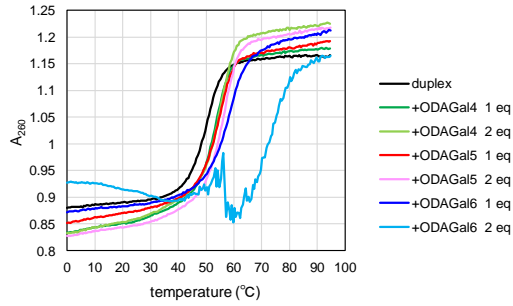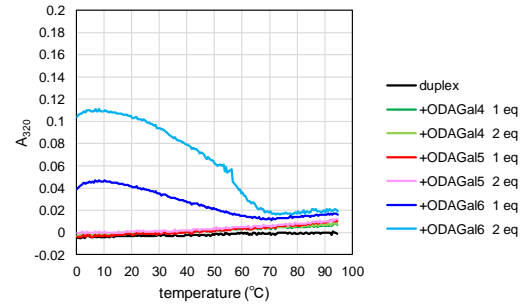

AP12MR

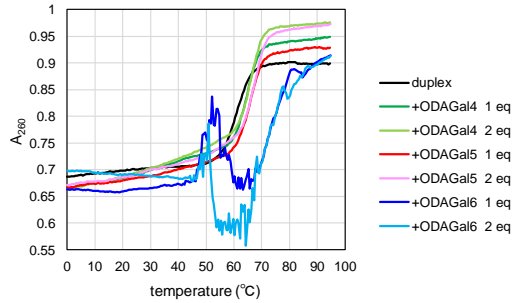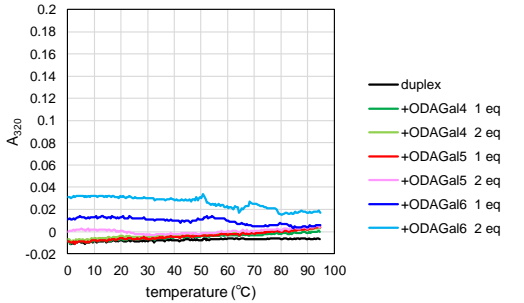

AP16G2

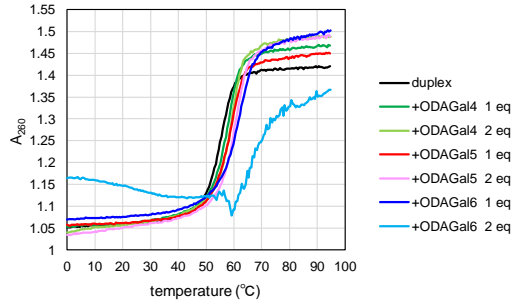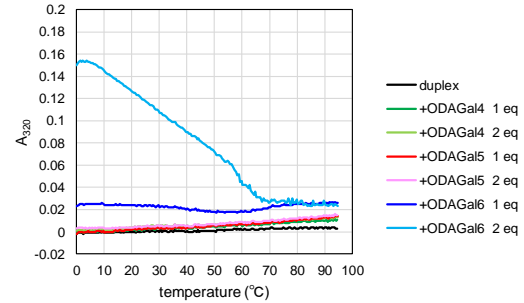



**ML16G2**

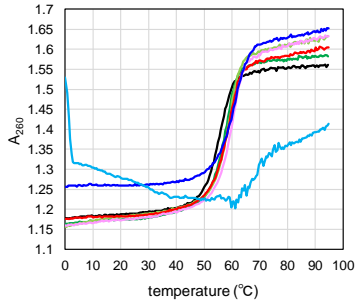

- duplex
- +ODAGal4 1 eq
- +ODAGal4 2 eq
- +ODAGal5 1 eq
- +ODAGal5 2 eq
- +ODAGal6 1 eq
- +ODAGal6 2 eq

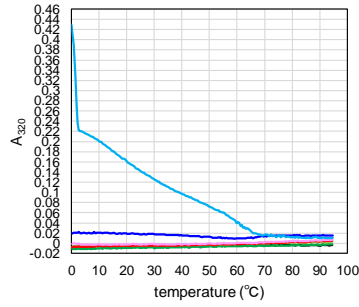

- duplex
- +ODAGal4 1 eq
- +ODAGal4 2 eq
- +ODAGal5 1 eq
- +ODAGal5 2 eq
- +ODAGal6 1 eq
- +ODAGal6 2 eq

**AP16G4**

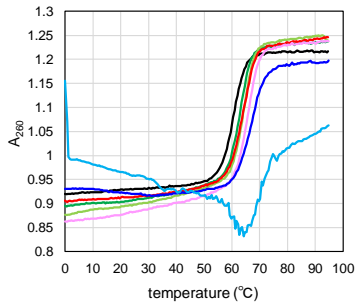

- duplex
- +ODAGal4 1 eq
- +ODAGal4 2 eq
- +ODAGal5 1 eq
- +ODAGal5 2 eq
- +ODAGal6 1 eq
- +ODAGal6 2 eq

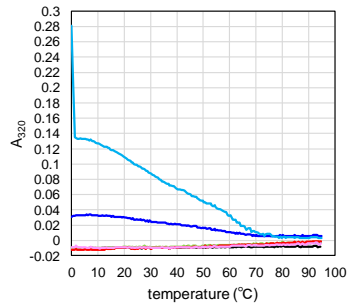

- duplex
- +ODAGal4 1 eq
- +ODAGal4 2 eq
- +ODAGal5 1 eq
- +ODAGal5 2 eq
- +ODAGal6 1 eq
- +ODAGal6 2 eq

**ML16G4**

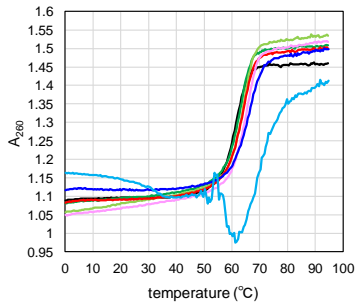

- duplex
- +ODAGal4 1 eq
- +ODAGal4 2 eq
- +ODAGal5 1 eq
- +ODAGal5 2 eq
- +ODAGal6 1 eq
- +ODAGal6 2 eq

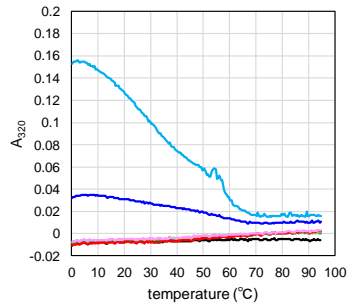

- duplex
- +ODAGal4 1 eq
- +ODAGal4 2 eq
- +ODAGal5 1 eq
- +ODAGal5 2 eq
- +ODAGal6 1 eq
- +ODAGal6 2 eq

**AP16MR**

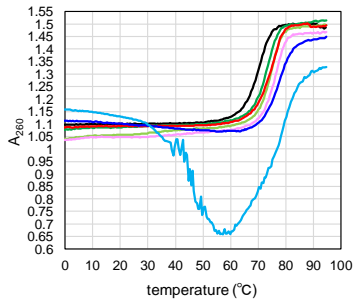

- duplex
- +ODAGal4 1 eq
- +ODAGal4 2 eq
- +ODAGal5 1 eq
- +ODAGal5 2 eq
- +ODAGal6 1 eq
- +ODAGal6 2 eq

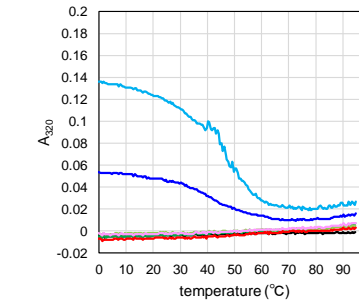

- duplex
- +ODAGal4 1 eq
- +ODAGal4 2 eq
- +ODAGal5 1 eq
- +ODAGal5 2 eq
- +ODAGal6 1 eq
- +ODAGal6 2 eq

ML16MR

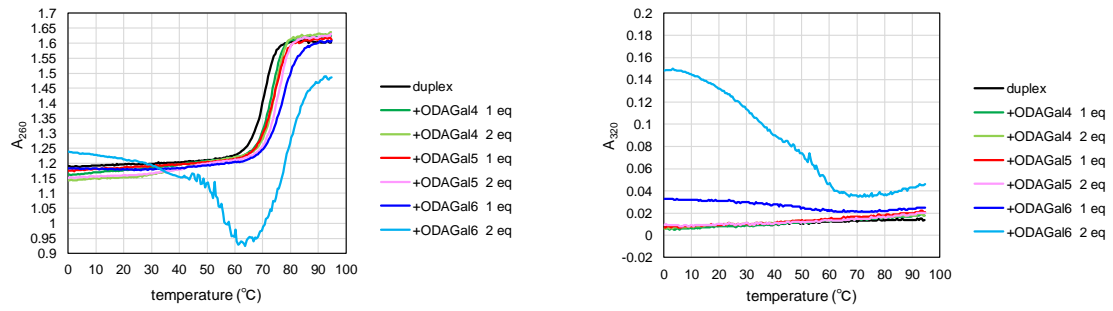

**Figure S4** UV melting curves of gapmer/RNA and 2'-OMe RNA/RNA in the absence and presence of ODAGals. (A) at 260 nm (B) at 320 nm.

## 7. UV spectra of oligomers

DNA/RNA (AP16DR)

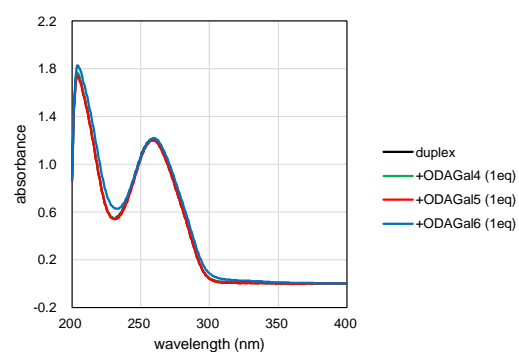

gapmer/RNA (2-12-2) (AP16G2)

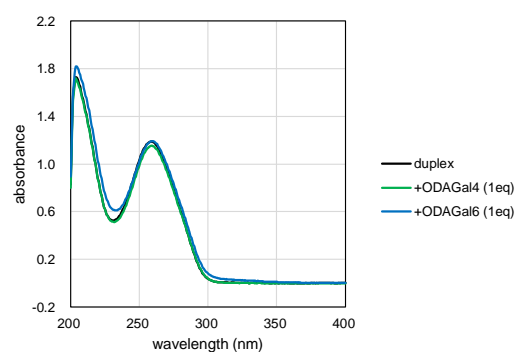

gapmer/RNA (4-8-4) (AP16G4)

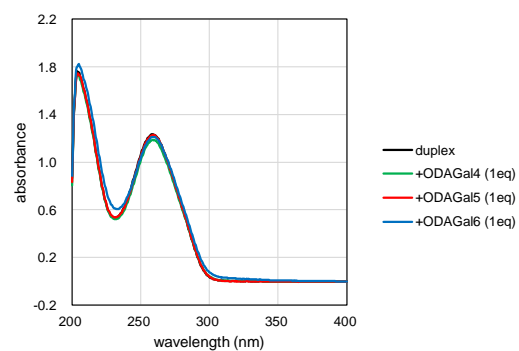

2'-OMe RNA/RNA (AP16MR)

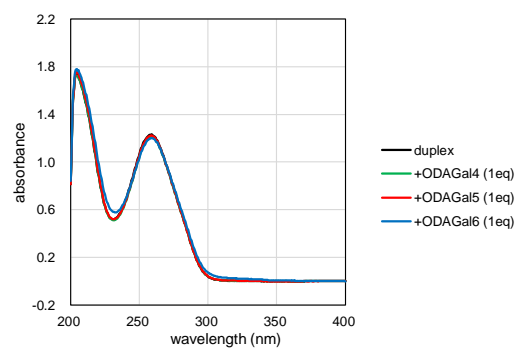

RNA/RNA (AP16RR)

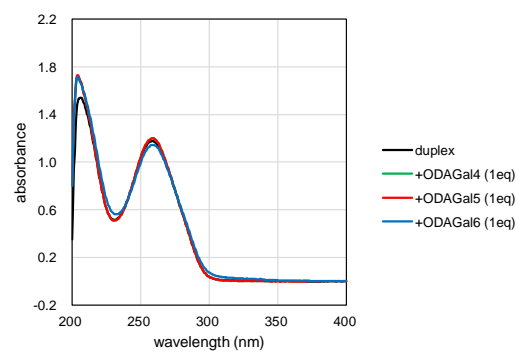

**Figure S5** UV spectra of 5  $\mu$ M duplexes in phosphate buffer at room temperature ( $24 \pm 1$  °C).

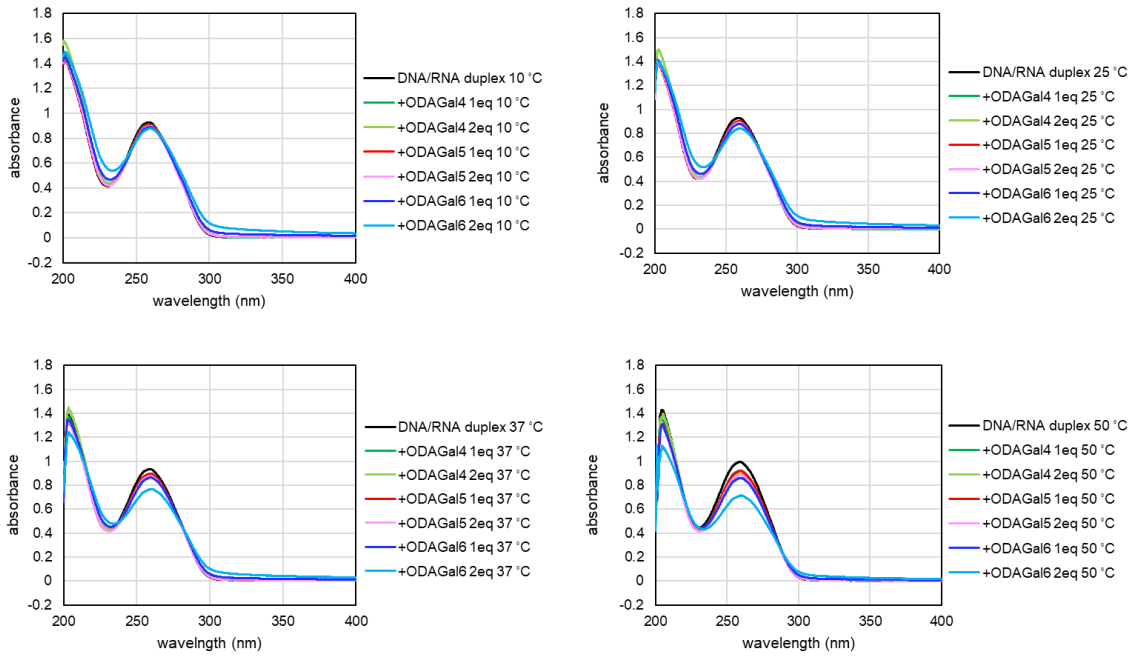

**Figure S6** UV spectra of 4  $\mu$ M DNA/RNA (AP16DR) in phosphate buffer.

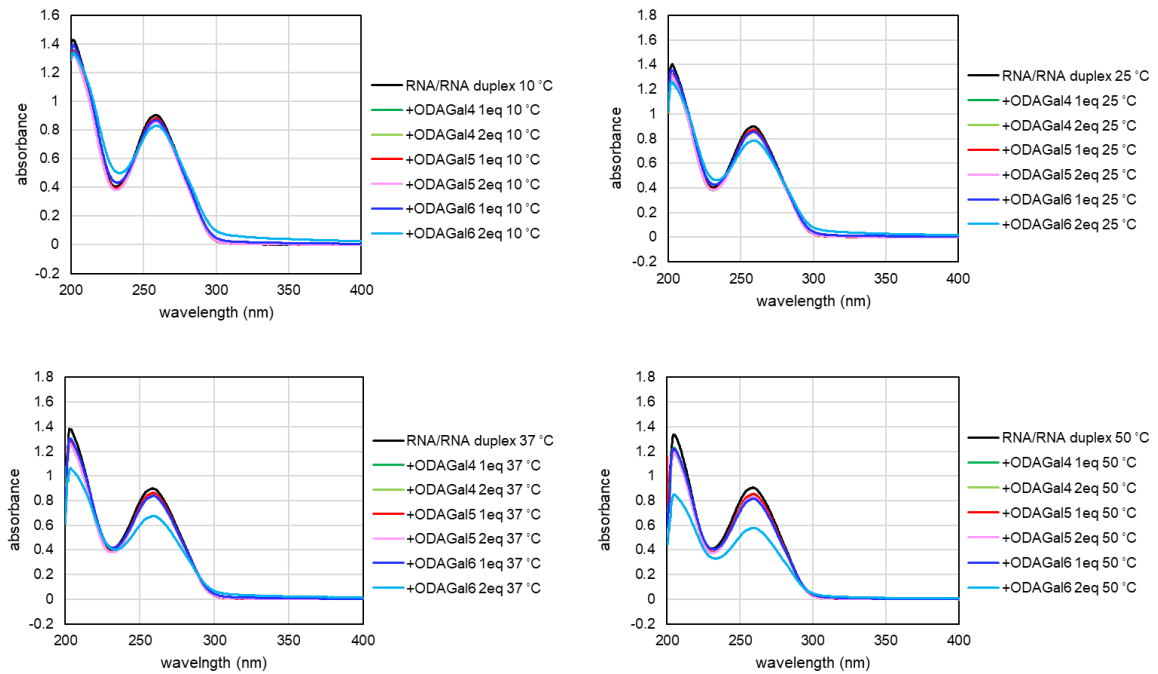

**Figure S7** UV spectra of 4  $\mu$ M RNA/RNA (AP16RR) in phosphate buffer.

## 8. CD spectra of oligomers

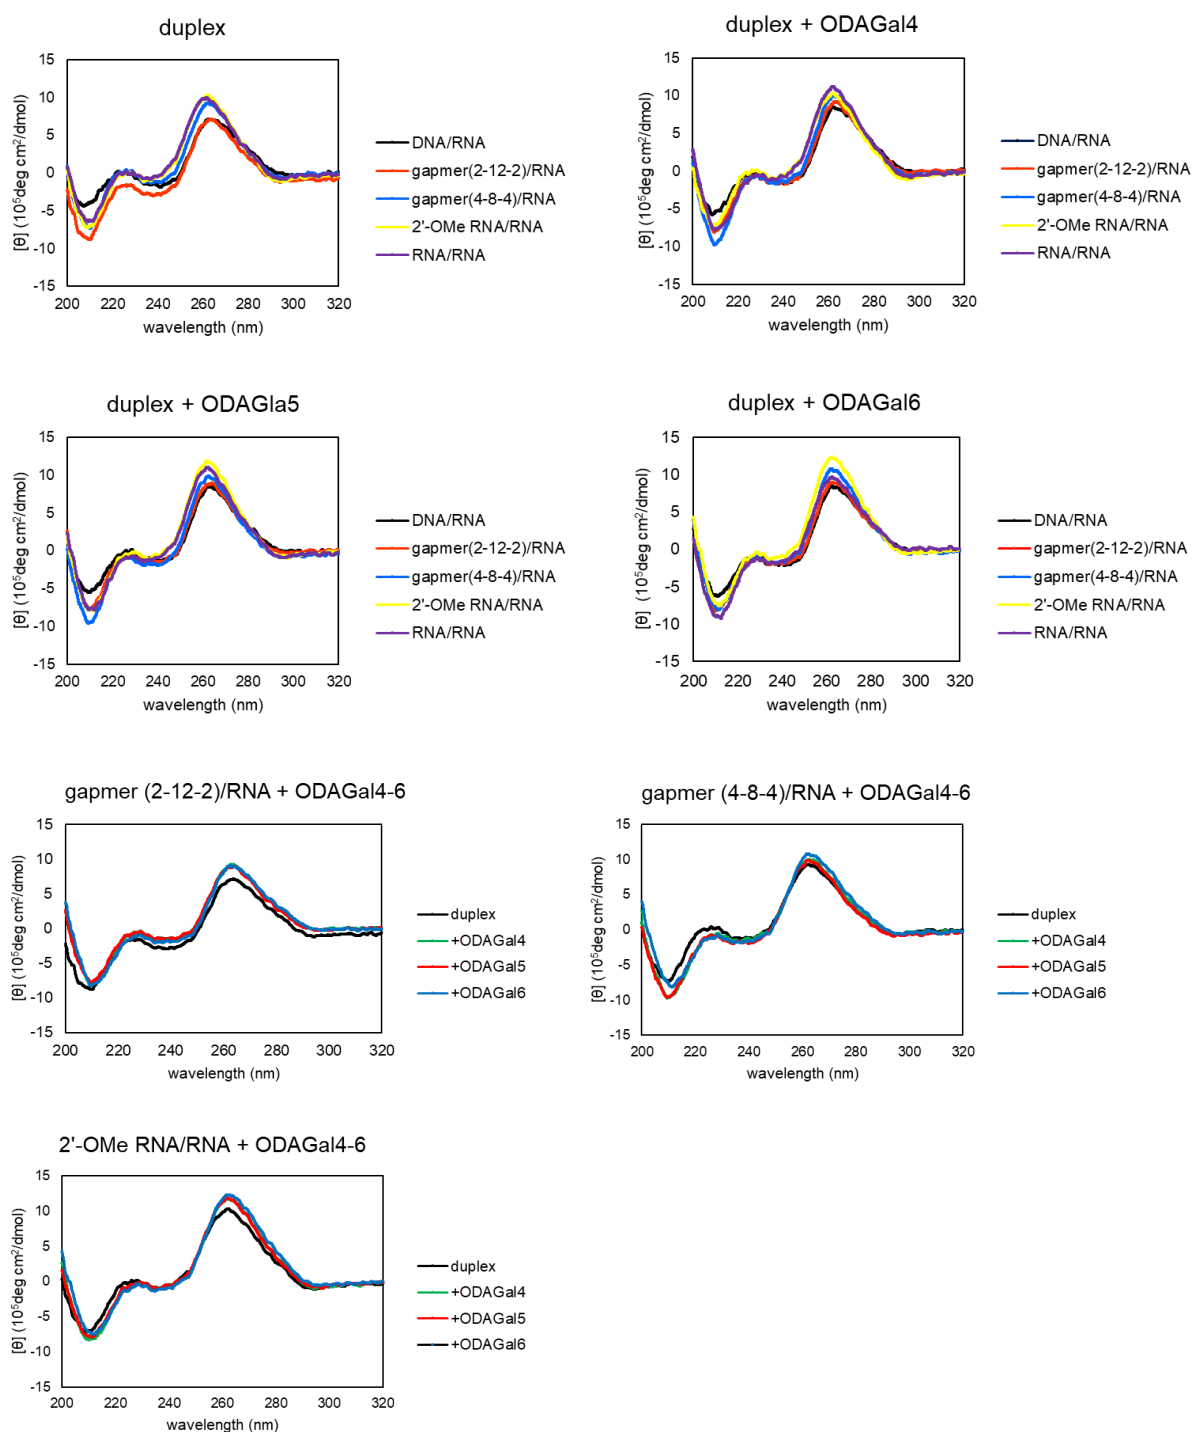

**Figure S8** CD spectra of duplexes in the presence and the absence of 1 equivalent of ODAGals at 37 °C. DNA/RNA: AP16DR; gapmer (2-12-2)/RNA: AP16G2; gapmer (4-8-4)/RNA: AP16G4; 2'-OMe RNA/RNA: AP16MR; RNA/RNA: AP16RR.

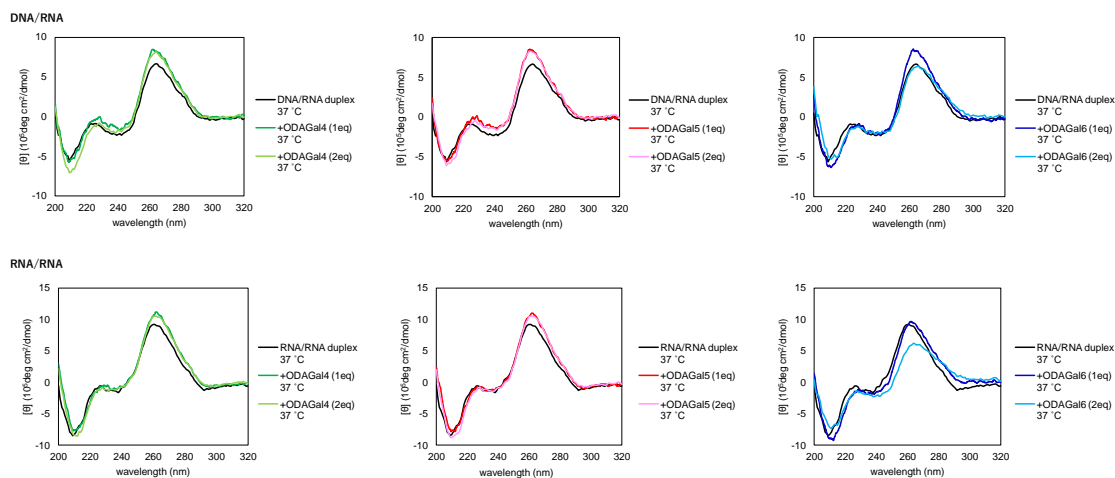

**Figure S9** CD spectra of DNA/RNA (AP16DR) and RNA/RNA (AP16RR) in the presence and the absence of 1 or 2 equivalents of ODAGals at 37 °C.

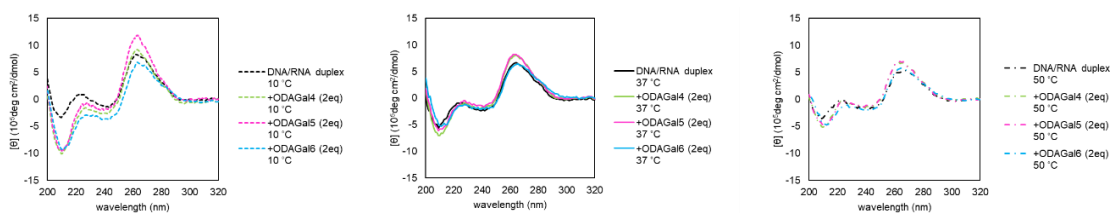

**Figure S10** CD spectra of DNA/RNA (AP16DR) in the presence and the absence of 2 equivalents of ODAGals.

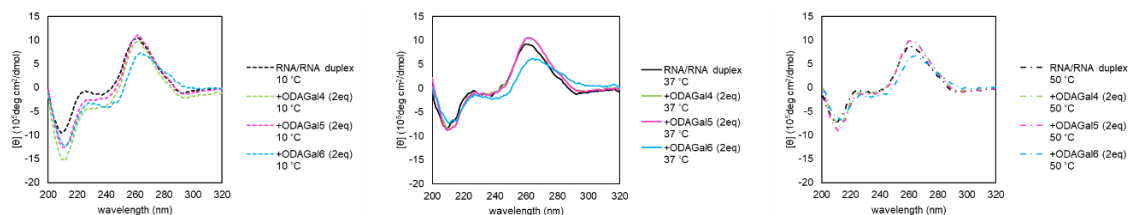

**Figure S11** CD spectra of RNA/RNA (AP16RR) in the presence and the absence of 2 equivalents of ODAGals.

## 9. RP-HPLC profiles of RNase A resistance experiment

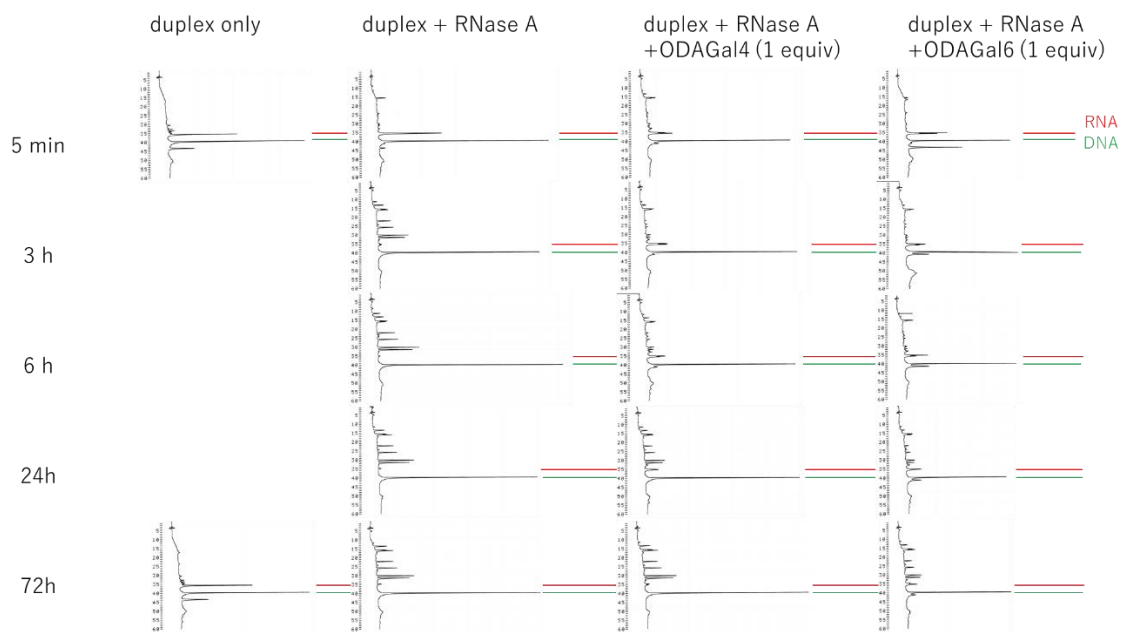

**Figure S12** RP-HPLC profiles of the mixture after treatment of 0.5 µg/mL RNase A. RP-HPLC analyses (UV detection at 260 nm) were performed using a linear gradient of 0%–20% CH<sub>3</sub>CN in 0.1 M triethyl ammonium acetate (TEAA) buffer (pH 7.0) at 30 °C for 60 min with a flow rate of 0.5 mL/min using a C18 column.

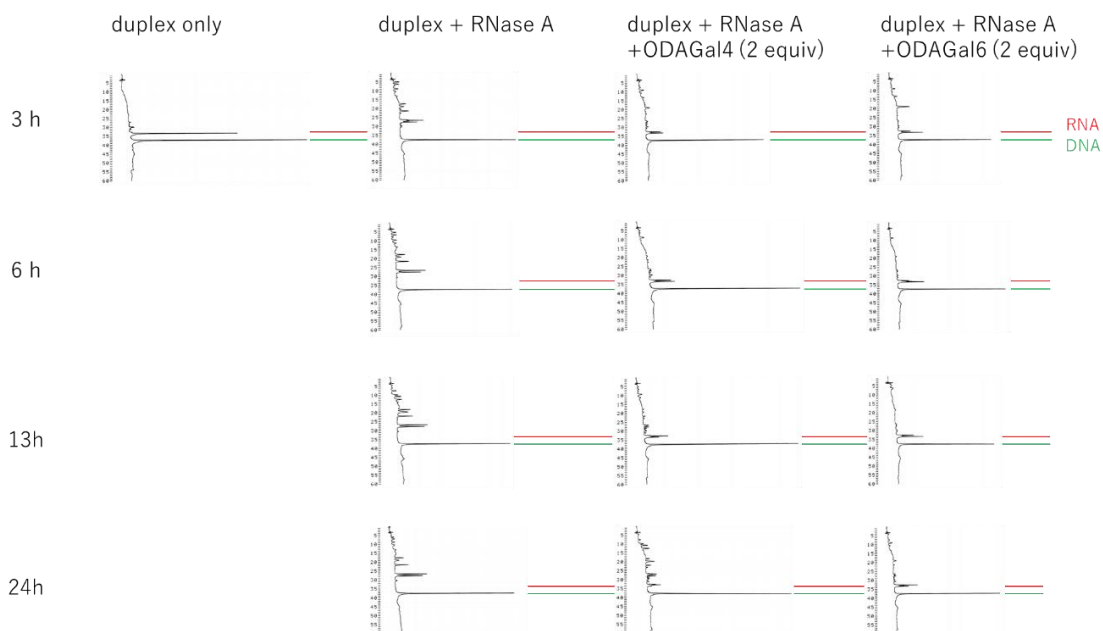

**Figure S13** RP-HPLC profiles of the mixture after treatment of 0.5 µg/mL RNase A. RP-HPLC analyses (UV detection at 260 nm) were performed using a linear gradient of 0%–20% CH<sub>3</sub>CN in

0.1 M TEAA buffer (pH 7.0) at 50 °C for 60 min with a flow rate of 0.5 mL/min using a C18 column.

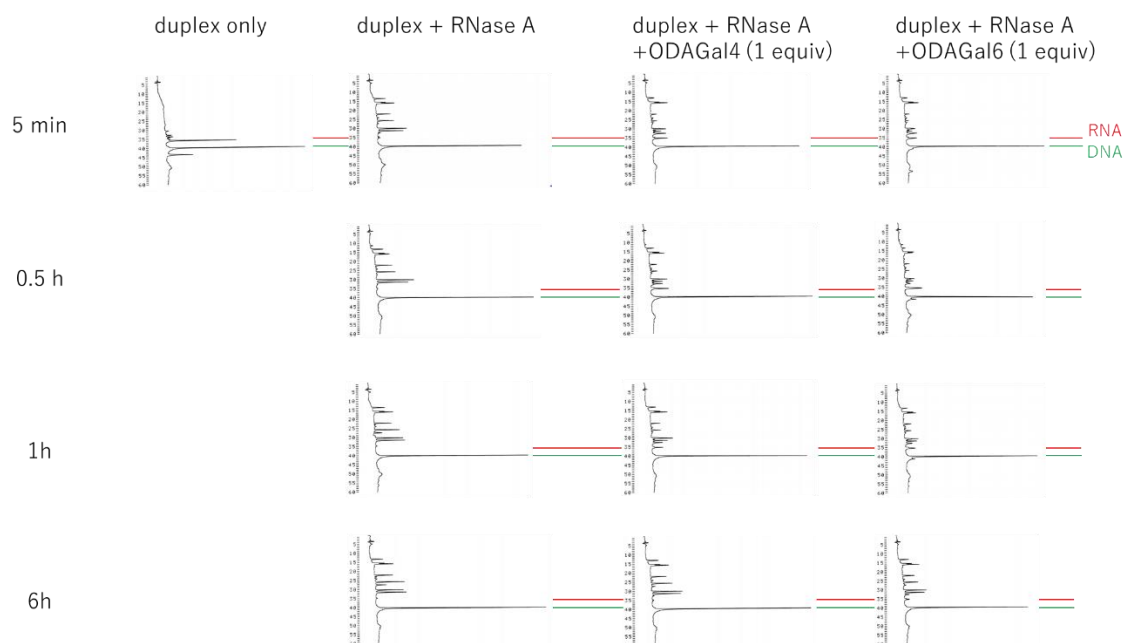

**Figure S14** RP-HPLC profiles of the mixture after treatment of 10  $\mu\text{g/mL}$  RNase A. RP-HPLC analyses (UV detection at 260 nm) were performed using a linear gradient of 0%–20%  $\text{CH}_3\text{CN}$  in 0.1 M TEAA buffer (pH 7.0) at 30 °C for 60 min with a flow rate of 0.5 mL/min using a C18 column.

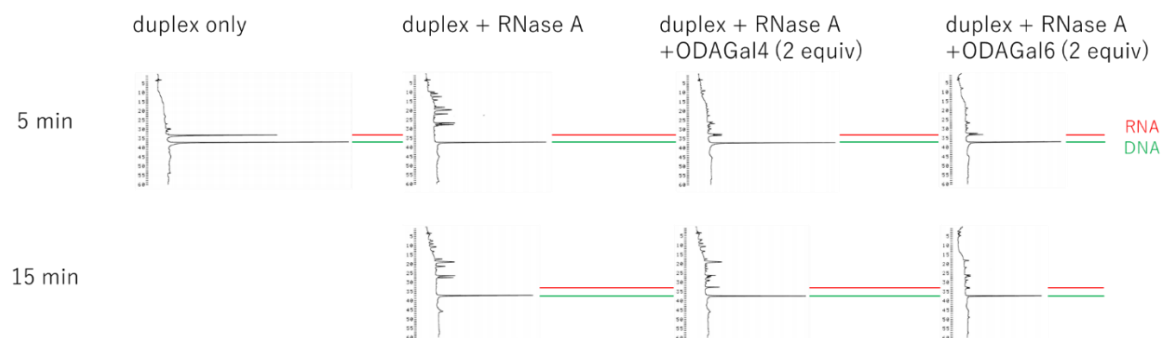

**Figure S15** RP-HPLC profiles of the mixture after treatment of 10  $\mu\text{g/mL}$  RNase A. RP-HPLC analyses (UV detection at 260 nm) were performed using a linear gradient of 0%–20%  $\text{CH}_3\text{CN}$  in 0.1 M TEAA buffer (pH 7.0) at 50 °C for 60 min with a flow rate of 0.5 mL/min using a C18 column.
